1 **The conserved ASCL1/MASH-1 ortholog HLH-3 specifies sex-specific ventral cord**  
2 **motor neuron fate in *C. elegans***

3

4 Lillian M. Perez\*, Aixa Alfonso\*

5

6 \*Biological Sciences, University of Illinois at Chicago, Chicago Illinois 60607, USA

7

8

9

10

11

12

13

14

15

16

17

18

19

20

21

22

23

24 **RUNNING TITLE:**

25 *hlh-3* specifies VC fate

26

27 **KEYWORDS**

28 Motor neurons, VCs, specification, differentiation, *hlh-3*

29

30 **CORRESPONDING AUTHOR INFORMATION**

31 Aixa Alfonso

32 University of Illinois at Chicago

33 840 W. Taylor, M/C 067

34 Chicago, IL 60607

35 Email: [aalfonso@uic.edu](mailto:aalfonso@uic.edu)

36 Phone: (312) 355- 0318

37

38

39

40

41

42

43

44

45

46

47  
48  
49  
50  
51  
52  
53  
54  
55  
56  
57  
58  
59  
60  
61  
62  
63  
64  
65  
66  
67  
68  
69

## ABSTRACT

Neural specification can be regulated by one or many transcription factors. Here we identify a novel role for one conserved proneural factor, the bHLH protein HLH-3, implicated in the specification of sex-specific ventral cord motor neurons in *C. elegans*. In the process of characterizing the role of *hlh-3* in neural specification, we document that differentiation of the ventral cord type C neurons, VCs, within their motor neuron class, is dynamic in time and space. Expression of VC class-specific and subclass-specific identity genes is distinct through development and dependent on where they are along the A-P axis (and their position in proximity to the vulva). Our characterization of the expression of VC class and VC subclass-specific differentiation markers in the absence of *hlh-3* function reveals that VC fate specification, differentiation, and morphology requires *hlh-3* function. Finally, we conclude that *hlh-3* cell-autonomously specifies VC cell fate.

## INTRODUCTION

70

71 Cells in the nervous system, neurons and glia, are extremely diverse in shape, function,  
72 and the mechanisms by which they connect to other cells. Generation of neurons and  
73 their acquisition of unique features require the commitment to neural fate by an  
74 ectodermal descendant, the specification of neural class within the neuronal precursor,  
75 and the differentiation into unique transcriptomic and morphological states of the  
76 postmitotic cell. Importantly, the acquisition of pan-neuronal identity is seen to be  
77 regulated differently than the acquisition of unique neuronal class identity features.  
78 Redundant regulators with multiple cis-regulatory inputs induce pan-neuronal features  
79 whereas terminal differentiation of neurons is induced by single inputs, encoded by so-  
80 called terminal selectors, and results in the expression of a unique repertoire of genes  
81 that promote neural class diversity (Hobert, 2016b; Stefanakis et al., 2015). Thus, the  
82 neural diversity displayed by the nervous system is possible by the concerted action of  
83 terminal selector factors that function spatiotemporally with precision (Allan & Thor,  
84 2015; Hobert, 2016a; Hobert & Kratsios, 2019; Kratsios et al., 2017). In *C. elegans*, the  
85 mechanisms that regulate neural specification can be studied thoroughly in time and in  
86 space, at single-cell resolution. This is a powerful model system that harbors a fully  
87 mapped body plan and nervous system, with continuously updated genomic and  
88 transcriptomic annotations, supporting studies in developmental biology, evolutionary  
89 conserved genes and networks, and beyond (Baker & Woollard, 2019; Cooper et al.,  
90 2018; Corsi et al., 2015; Emmons, 2016; Hammarlund et al., 2018; Sulston & Horvitz,  
91 1997).

92 Here we characterize the role of a conserved proneural-like protein and ortholog  
93 of ASCL1/MASH-1, HLH-3, in *C. elegans* nervous system development. HLH-3 contains  
94 a conserved basic helix-loop-helix (bHLH) domain, which is 59% (31/54) identical to  
95 MASH1 and 61% identical to ASCL1 (33/54). HLH-3 heterodimerizes with the Class I  
96 bHLH transcription factor HLH-2, predicted ortholog of TCF3/TCF4/TCF12 (Kim et al.,  
97 2018; Krause et al., 1997). Our previous work has implicated HLH-3 in the terminal  
98 differentiation of the hermaphrodite-specific motor neurons, HSNs, a bilateral pair of  
99 neurons that function in the egg-laying circuitry (Doonan et al., 2008; Raut, 2017,  
100 Schafer, 2006). Work by others has shown that the gene *hlh-3* has diverse functions in  
101 the nervous system: it is necessary for the appropriate death of the sisters of the NSMs  
102 (Thellmann et al., 2003); it works in combination with other transcription factors to  
103 induce the serotonergic program in HSNs, and moreover, its ortholog, ASCL1, can be a  
104 functional substitute (Lloret-Fernández et al., 2018); it promotes neurogenesis of IL4  
105 (Luo & Horvitz, 2017); it co-regulates the initiation of expression of the terminal selector  
106 gene *ttx-3* (Murgan et al., 2015); and it regulates the chemoreceptor gene *srh-234*  
107 (Gruner et al., 2016). Yet, one area that remains to be explored is the function of *hlh-3*  
108 in the post-embryonic ventral cord.

109 We were the first to report that *hlh-3* is expressed in the embryonically generated  
110 P cells, ectodermal-like precursors of all post-embryonically generated ventral cord  
111 motor neurons. We also showed that by the third larval stage (L3) expression of a  
112 truncated translational fusion *hlh-3* was restricted to the VCs, a hermaphrodite sex-  
113 specific type of neuron (Doonan et al., 2008). This expression pattern is consistent with  
114 a role in neuroblast specification, a function of canonical proneural proteins. However, it

115 remained to be determined whether *hlh-3* had a function in the specification of their  
116 lineage descendants (including sex-shared as well as sex-specific). Here we report on  
117 the role of *hlh-3* in the development of these postembryonic ventral cord motor neurons.  
118 We show it is necessary for the acquisition and maturation of the hermaphrodite sex-  
119 specific VC class only.

120         The postembryonic ventral cord motor neurons are made up of both sex-specific  
121 and sex-shared neurons arising from the anterior descendants of ectodermal-like P  
122 blast cells (Pn.a) (Sulston & Horvitz, 1977). After two additional cell divisions, the  
123 Pn.aap cells give rise to the sex-specific neurons of the ventral cord. In hermaphrodites,  
124 the P3-P8.aap cells give rise to the ventral cord neuron type C (VC) (Figure 1A, B),  
125 whereas in males Pn.aapa and Pn.aapp (where n = descendant of P3 to P11), give rise  
126 to the ventral cord neuron type CA and CP, respectively (Sulston et al., 1980). Their fate  
127 acquisition (generation) is influenced by positional cues (Hox genes), differential  
128 survival (programmed cell death), and sexual identity (VC vs. CA/CP). The VCs of the  
129 hermaphrodite are positioned in the midbody and make up six of the total eight sex-  
130 specific neurons. Equivalent lineage descendants (Pn.aap) of P1, P2, and P9-12 cells in  
131 hermaphrodites undergo programmed cell death (Clark et al., 1993). Survival of VCs  
132 requires the function of the HOX gene *lin-39* and the HOX cofactors encoded by *unc-62*  
133 and *ceh-20* (Clark et al., 1993; Salser et al., 1993). UNC-62, along with LIN-39,  
134 promotes survival of the VCs by ensuring CEH-20 localizes to the nucleus; the LIN-  
135 39/CEH-20 complex then represses *egl-1* transcription (Liu et al., 2006; Potts et al.,  
136 2009). Sexual determination of the Pn.aap cells is established by the first larval (L1)  
137 stage (as VCs in hermaphrodites and the precursors of CAs and CPs in males) (Kalis et

138 al., 2014). It was also shown that LIN-39 is not required for the expression of the VC  
139 terminal differentiation feature *ida-1*. Moreover, since the surviving descendants from  
140 P1, P2, and P9-12 still express *ida-1::gfp* in *lin-39 (lf); ced-3 (lf)* double mutants, it was  
141 concluded that the role of LIN-39 is most likely restricted to VC survival, not  
142 differentiation (Kalis et al., 2014). However, recent evidence has implicated a role for  
143 LIN-39 in the expression of a VC marker *srb-16* (Feng et al., 2020). Nevertheless, the  
144 mechanisms underlying VC class specification and differentiation are less understood.  
145 To date, it is not known which factor(s) initiate the differentiation program of VCs to  
146 establish a class-wide identity.

147 While the mechanisms that regulate VC class specification have yet to be  
148 determined, the mechanisms that regulate VC subclass identity are better understood.  
149 Within the VC class, two VC subclasses are distinguished spatially by their proximity to  
150 the vulva, categorized as proximal VCs or distal VCs (Schafer, 2006). The two VC  
151 neurons that flank the vulva are categorized as “proximal” (VC 4 and VC 5), whereas  
152 the other four VCs are “distal” to the vulva (VC 1-3, and VC 6) (Figure 1C). Genetic  
153 analysis of *unc-4* has revealed that VC subclass is determined by spatial cues.  
154 Specifically, the expression of *unc-4* as a VC proximal subclass identity gene requires  
155 the secretion of EGF from vulval tissue (vulF cells) (Zheng et al., 2013). EGF signaling  
156 promotes proximal VC subclass fate by de-repression of *unc-4* in the proximal VCs only.  
157 Thus, a non-cell autonomous mechanism mediates one aspect of VC differentiation,  
158 specifically in proximal VCs.

159 Here we build on the current knowledge of neural specification in *C. elegans* and  
160 discover that the proneural-like bHLH factor, HLH-3, mediates specification and

161 differentiation of the VC sex-specific motor neurons, that is, it is needed early and late in  
162 development. By using transcriptional reporter genes to assess VC differentiation in the  
163 absence of *hlh-3* function, we find that VC class and subclass identity, as well as  
164 morphology, is compromised. Our work is the first to identify a function for the  
165 ASCL1/MASH-1 ortholog, HLH-3, in the ventral cord, sex-specific neurons of *C. elegans*  
166 hermaphrodites. We conclude that HLH-3 is necessary for the expression of the earliest  
167 VC class-specific transcriptional regulator (*lin-11*) and is required for the expression of  
168 later acting VC class-specific genes.

169

170

## RESULTS

### 171 **The Class II bHLH protein HLH-3 is expressed and localized to the nuclei of VCs** 172 **from L1 through adulthood**

173 We have previously shown that in hermaphrodites, *hlh-3* is expressed in the  
174 postembryonic descendants of the ectodermal-like P cells as well as the HSNs (Doonan  
175 et al., 2008). We also have shown that *hlh-3* function is cell-autonomously required for  
176 normal axon pathfinding and terminal differentiation of the HSNs (Doonan, 2006;  
177 Doonan et al., 2008; Raut, 2017). In those studies, analysis of the expression of a  
178 translational fusion reporter with only the first eight amino acids of HLH-3 fused to GFP  
179 revealed that expression was widespread in the Pn.a descendants, dynamic, and with  
180 time, restricted to the VCs (Pn.aap) and HSNs. To confirm the endogenous  
181 spatiotemporal expression pattern of *hlh-3* we created *ic271 [hlh-3::gfp]*, a CRISPR-  
182 Cas-9 fluorescent tag at the C terminus of the *hlh-3* genomic locus (Figure 2A) following  
183 established genome-engineering protocols (Dickinson et al., 2015), and characterized



184 its expression pattern. Our analysis supports our initial findings (Doonan, 2006; Doonan  
185 et al., 2008), the recently reported observation that *hlh-3* expression reappears in the  
186 HSNs at the L4 developmental stage (Lloret-Fernández et al., 2018), and expands our  
187 understanding of its role in the VCs (Doonan, 2006; Raut, 2017).

188 We confirmed that *hlh-3* is expressed post-embryonically in the P cells and their  
189 descendants and becomes restricted to the terminally differentiated VCs present in  
190 adults (Figure 2C, 2D, and 2E). After hatching, animals show the expression of *hlh-3*  
191 throughout the ventral nerve cord (VNC). We highlight the expression of *hlh-3* in an  
192 early L1 animal wherein Pn.p expression extinguishes faster than that in Pn.a and its  
193 descendants (Figure 2C, left panel). As development proceeds, expression is  
194 extinguished from other descendants of the Pn.a cells and restricted to the VCs (Figure  
195 2C middle and right panels). While fluorescent reporter intensity was not quantified, *hlh-*  
196 *3* expression appears to be down-regulated in a window of the fourth larval stage (L4)  
197 development ranging from mid L4 to late L4, before increasing in adulthood (Figure 2D,  
198 middle and right panels). To ensure that the detected nuclei in adults are those of VCs,  
199 we characterized whether there was co-expression of *hlh-3::gfp* with *plin-11::mCherry*, a  
200 known VC marker (Figure 2E, bottom left). We find that the *hlh-3::gfp* positive nuclei are  
201 also *plin-11::mCherry* positive (Figure 2E, top right panel). Interestingly, low levels of  
202 *hlh-3::gfp* expression is also observed in a pair of vulval cells during mid-late substages  
203 of L4 development, suggesting a role for *hlh-3* in these lineages (data not shown).  
204 Expression of *hlh-3* in VCs from their birth in L1 through their terminally differentiated  
205 stage in adulthood prompted us to investigate the role of *hlh-3*, as a factor required for  
206 an early role in promoting VC fate and required for maintenance of VC fate throughout

207 development. Throughout we will use the allele *hlh-3 (tm1688)*, which eliminates the  
208 majority of the bHLH domain and transcription start site rendering this a null allele and  
209 further referred to in this paper as *hlh-3 (lf)* (Figure 2B, Doonan et al., 2008).

210

### 211 **Differentiation of VC class and VC subclass motor neurons is dynamic**

212 Before we analyzed the role *hlh-3* in VCs, we first characterized differentiation features  
213 of VCs by defining VC class versus VC subclass-specific terminal identity. Here we took  
214 advantage of fluorescent reporter genes that serve as markers of VC fate. We  
215 examined the expression of the known VC class-specific markers *lin-11*, *ida-1*, and *glr-5*  
216 encoding a LIM homeodomain transcription factor (Freyd et al., 1990), a protein tyrosine  
217 phosphatase-like receptor protein homolog of IA2 (Cai et al., 2001, 2004; Zahn et al.,  
218 2001), and a glutamate receptor subunit (Brockie et al., 2001), respectively. We  
219 confirmed that expression of *lin-11* in VCs is observed as early as the second larval  
220 stage (L2), and through adulthood (data not shown) (Hobert et al., 1998; Zheng et al.,  
221 2013).

222 Unlike *lin-11*, a transcriptional regulator, the other VC class terminal identity  
223 genes *ida-1* and *glr-5* are expressed later in development, arising at the L4  
224 developmental stage (Figure 3A and 3B). Analysis of these VC class differentiation  
225 markers throughout L4 substages revealed distinct spatiotemporal patterns suggesting  
226 different pathways regulate them. Expression of *ida-1* and *glr-5* is not equivalent across  
227 all 6 VCs during L4 development (Figure 3A and 3B). Classification of the L4 substages  
228 (early, mid, and late) is based on the vulval L4 morphology as previously described  
229 (Mok et al., 2015). We noted that *glr-5* expression is first detected in the early L4

230 substages and only in the proximal VC subclass, whereas expression can be detected  
231 in the distal VCs by late L4 substages (Figure 3B). In contrast to *glr-5*, *ida-1* expression  
232 is nearly equivalent in all VCs since the beginning of L4, but its expression is always  
233 detectable in the posterior VCs (Figure 3A). Thus, while the six VCs terminally express  
234 their class-specific terminal differentiation genes *ida-1* and *glr-5*, the initiation of  
235 transcription is distinct across the sub-stages of L4 development.

236         Next, we characterized the expression pattern of the VC subclass-specific  
237 terminal identity genes *unc-4* and *unc-17*. Others have shown that *unc-4* expression  
238 requires *lin-11* and vulval EGF signaling (Zheng et al., 2013). We corroborate that *unc-4*  
239 expression is detected after the mid-L4 stages and is maintained throughout adulthood  
240 only in VC 4 and VC 5 (Figure 3C). The expression of UNC-17, in turn, is known to  
241 require a posttranscriptional step mediated by UNC-4 (Lickteig et al., 2001). Therefore,  
242 we analyzed the expression of two transcriptional *unc-17* reporters. To our surprise, and  
243 in contrast to work by others, we only detect the expression of *unc-17* in VC 4 and VC 5  
244 at the adult stage regardless of which reporter we characterized (Supplemental Figure  
245 1) (Pereira et al., 2015). However, our work is different from others in that we did not  
246 assess a translational reporter. Instead, we looked at two transcriptional reporters  
247 *vsIs48* (*punc-17::gfp*) and *mdEx865* (*unc-17p::NLS::mCherry + pha-1(+)*) and did not  
248 observe *unc-17* expression in the distal VCs 1-3 and 6 with either reporter (*vsIs48*  
249 expression is shown in Supplemental Figure 1B top panel; *mdEx865* expression is not  
250 shown). Although we do not see the *unc-17* reporters in the distal VCs we still detect a  
251 VC marker (*lin-11*) in these cells (Supplementary Figure 1B middle and bottom panels).  
252 Our observations are also consistent with previous reports that anti-UNC-17

253 immunoreactivity is robust in VC 4 and VC 5, but rarely detectable in distal VCs (Duerr  
254 et al., 2008; Lickteig et al., 2001) and possibly only in the second larval (L2) stage  
255 (Alfonso et al., 1993).

256

### 257 ***mir-124* is a novel VC subclass-specific identity feature**

258 In our search for VC subclass identity genes, we found *mir-124*, the highly conserved  
259 non-coding microRNA, as a novel VC subclass-specific differentiation feature. In *C.*  
260 *elegans* it has been documented to be expressed in a variety of sensory neurons and  
261 the HSNs (Clark et al., 2010). Here we characterized *mir-124* expression across  
262 postembryonic development; we only see it in a restricted window. We find *mir-124* is  
263 expressed from early L4 larval substages through early adulthood, but not in mature  
264 gravid egg-laying hermaphrodites (Figure 3D), which suggests it is required for the  
265 maturation of the VCs but not for maintenance of VC fate. This expression pattern is  
266 unlike that of other proximal VC identity features *unc-4* and *unc-17*, which are  
267 expressed throughout adulthood (Figure 3C, Supplemental Figure 1). Therefore, we  
268 classify *mir-124* as a novel VC subclass-specific feature expressed during early  
269 differentiation. In summary, we conclude that *mir-124* can be added to the list of VC  
270 identity features belonging to the proximal class (Figure 4).

271

### 272 **Classification of VC identity**

273 Thus far, we have shown that the VC class of neurons acquire class-specific features  
274 via mechanisms that differ in time and space. We have also shown that not all six VCs  
275 are identical in their repertoire of transcriptional activity. In Figure 4, we summarize the

276 spatiotemporal expression pattern of VC identity features. Two genes encoding  
277 presumptive transcription factors, *hlh-3* and *lin-11*, are VC class-specific and *hlh-3*  
278 expression precedes that of *lin-11* (Figure 4A-C). We classify the *ida-1* and *glr-5* genes  
279 as VC class-specific as well, as they are observed in all six VCs from L4 through  
280 adulthood. In contrast, *mir-124* is not expressed in adulthood, as the rest of the VC  
281 terminal identity features are. Finally, *unc-17* was observed in the proximal VCs only. It  
282 is worth emphasizing that aside from the analysis of the CRISPR-engineered *hlh-3::gfp*  
283 line, our analysis is based on the characterization of transcriptional reporters  
284 (Supplementary Table 1).

285

### 286 ***hlh-3* function is required for the acquisition of VC class and VC subclass identity** 287 **features**

288 Previously, *hlh-3* has been shown to be required for HSN terminal differentiation  
289 (Doonan et al., 2008; Lloret-Fernández et al., 2018; Raut, 2017). To address whether  
290 *hlh-3* has a role in VC differentiation we first examined reporters of VC terminal identity  
291 the genes *lin-11*, *ida-1* and *glr-5*, in a strain harboring a total loss of *hlh-3* function allele,  
292 *hlh-3 (tm1688)* (Doonan et al., 2008, Figure 2B). We find that expression of the terminal  
293 VC class markers *lin-11*, *ida-1* and *glr-5* is reduced in most of the VCs of one day old  
294 *hlh-3 (lf)* adult hermaphrodites (Figure 5A, 5B, and 5C). In fact, expression of the  
295 differentiation features *ida-1* and *glr-5* (not shown) in the earlier stages of L4  
296 development is completely absent in *hlh-3 (lf)* hermaphrodites (Supplementary Figure 2  
297 A and B).

298 Next, we examined the expression of VC subclass-specific identity features, *mir-*  
299 *124*, *unc-4*, and *unc-17* (Figure 5 and Supplemental Figure 1). We find that the early  
300 differentiation subclass-specific feature *mir-124* (*mjls27: mir-124p::gfp + lin-15(+)*) is  
301 completely absent in *hlh-3* (*lf*) (Figure 5D). We followed up with an analysis of *unc-4*.  
302 Others have shown that the expression of this VC subclass-specific terminal identity  
303 gene is de-repressed in WT animals after EGF signaling in mid-L4 development (Zheng  
304 et al., 2013). Here, we find that the absence of *hlh-3* function negatively affects *unc-4*  
305 expression (Figure 5E). Since *unc-4* expression is required for *unc-17* expression  
306 (Lickteig et al., 2001), not surprisingly we find that expression of *unc-17*, is missing the  
307 proximal VCs in *hlh-3* (*lf*) individuals (Supplemental Figure 1E).

308

### 309 ***hlh-3* is required for normal axon branching of proximal VCs**

310 Along with less expression of VC terminal identity transcriptional reporters, proximal  
311 VCs have abnormal axonal branching in the vulval ring (Figure 5F). This defect  
312 suggests that proximal VC function may be impaired in *hlh-3* (*lf*), as axonal branching is  
313 required for synaptic connections to the egg-laying circuitry. Thus, growth and  
314 maturation of VC axons require *hlh-3* function, as it is the case for the HSNs (Doonan,  
315 2006; Doonan et al., 2008; Raut, 2017).

316

### 317 **VCs survive in the absence of *hlh-3* function**

318 Our analysis of VC class and VC subclass markers indicate that the expression of VC  
319 differentiation markers is compromised in *hlh-3* (*lf*) individuals. To ensure VC survival  
320 occurs we next sought to eliminate the possibility that VCs inappropriately undergo

321 programmed cell death in *hlh-3 (lf)*. Programmed cell death (PCD) is a conserved  
322 pathway executed by CED-3, a caspase that functions as the final determinant in the  
323 cell death pathway (Conradt et al., 2016). Inhibition of this pathway, by impairment of  
324 *ced-3* function, results in the survival of cells destined to die. In the context of the ventral  
325 nerve cord, the cells P1-P2.aap and P9-12.aap will survive (Figure 6A). Therefore, we  
326 introduced a *ced-3* null mutation into *hlh-3 (lf)* mutants and analyzed the expression of a  
327 VC differentiation marker, *glr-5*, in *ced-3 (lf)* and *ced-3 (lf); hlh-3 (lf)* individuals. Unlike  
328 *ced-3 (lf)* hermaphrodites, which express *glr-5* in all VCs including the surviving P2.aap  
329 cell, we find that *ced-3 (lf); hlh-3 (lf)* mutants do not express *glr-5* in VCs or the surviving  
330 VC-like cell P2.aap (Figure 6B, 6C, and 6D). Therefore, we conclude that the reason VC  
331 neurons do not express *glr-5* in the absence of *hlh-3* function is that they need HLH-3 to  
332 fully differentiate and not because they undergo inappropriate PCD.

333

### 334 ***hlh-3* functions cell-autonomously in the VC class**

335 To address whether *hlh-3* functions cell-autonomously, we assayed expression of a VC  
336 differentiation marker *plin-11::mCherry* in *hlh-3 (lf)* mutants with a rescuing copy of *hlh-*  
337 *3*. The rescuing extrachromosomal array [*icEx274 (plin-11::pes-10::hlh-3cDNA::GFP;*  
338 *pmyo-2::mCherry)*] was made by introducing a *hlh-3* cDNA into pDM4 (previously  
339 shared by Michael Koelle) harboring a VC-specific regulatory region of *lin-11* fused to  
340 the basal *pes-10* promoter (Doonan, 2006). We find that whereas *hlh-3 (lf)* mutants fail  
341 to express the VC differentiation marker *plin-11::mCherry* in most VCs, *hlh-3 (lf)*  
342 mutants that contain the rescuing extrachromosomal array *icEx274* express *plin-*

343 *11::mCherry* in almost all VCs (Figure 7A and B). These findings demonstrate that *hlh-3*  
344 function is cell-autonomous.

345

346 ***hlh-3* does not affect the differentiation of other sex-shared neurons in the ventral**  
347 **cord**

348 Given that expression of the *hlh-3* CRISPR-edited reporter is detectable in the P cells  
349 and its descendants we wished to address whether the absence of *hlh-3* function  
350 resulted in defects in the sex-shared neurons. To address this question, we analyzed  
351 the expression of cholinergic and GABAergic markers in *hlh-3 (lf)* mutant  
352 hermaphrodites. The transcriptional reporter *vsIs48 [punc-17::gfp]* gene marks all  
353 cholinergic neurons expressing a vesicular acetylcholine transporter (within the VNC  
354 this includes VA, VB, AS, DA, DB, Supplemental Figure 1A) (Wormbase: Curatorial  
355 remark). The transcriptional reporter *otIs564 [punc-47::mChOpti]* marks all GABAergic  
356 neurons expressing a vesicular GABA transporter (within the VNC this includes DD and  
357 VD neurons, Supplemental Figure 3A) (Gendrel et al., 2016). We find that the total  
358 number of cholinergic neurons anterior to the vulva is equivalent between WT and *hlh-3*  
359 (*lf*) individuals (Supplemental Figure 1C). Likewise, the total number of GABAergic  
360 neurons is equivalent between WT and *hlh-3 (lf)* hermaphrodites (Supplemental Figure  
361 3B). These analyses demonstrate that the cholinergic and GABAergic sex-shared  
362 ventral cord motor neurons acquire their terminal neurotransmitter fate. Thus, *hlh-3*  
363 function is not necessary for the acquisition of the terminal fates in sex-shared neurons,  
364 rendering its function specific to the terminal differentiation of sex-specific ventral cord  
365 VC neurons.



366

367 **The male-specific ventral cord motor neurons do not require *hlh-3* function**

368 We wondered whether the male-specific ventral cord motor neuron differentiation was  
369 also dependent on *hlh-3* function. The CA and CP pairs of male motor neurons arise  
370 from the division of the Pn.aap neuroblast, anteriorly (type CA) and posteriorly (type CP)  
371 (Sulston et al., 1980; Supplementary Figure 4A). We tracked differentiation of the CAs  
372 1-9 and the CPs 1-6 with the differentiation markers for *ida-1* and *tph-1*, respectively  
373 (Supplementary Figure 4B). We find that the *hlh-3 (lf)* males when compared to WT  
374 males show expression of differentiation markers in all CA and CP neurons, nearly at  
375 equivalent proportions (Supplementary Figure 4C and 4D). This suggests that *hlh-3*  
376 does not have a role in promoting the differentiation of these neurons. Notably, we did  
377 not quantify CP0 (descendant of the P2 lineage) although we did observe expression of  
378 *pida-1::gfp* in both WT males and *hlh-3 (lf)* (data not shown).

379

380

## DISCUSSION

381

### ***hlh-3* specifies VC fate**

382 Our work identifies *hlh-3* as a regulator of sex-specific motor neuron differentiation in  
383 the postembryonic VNC of the hermaphrodite. Both terminal and non-terminal identity  
384 features associated with the sex-specific motor neurons, VCs, are reduced or absent in  
385 animals that lack *hlh-3* function. While most of our analysis measures transcriptional  
386 gene activity of VC identity genes, we also demonstrate that the morphology of the VC  
387 subclass is affected. In summary, we implicate *hlh-3* in the specification of the VC motor  
388 neuron class.

389

390 **Differentiation of the proximal VCs involve *hlh-3* dependent and *hlh-3*-**  
391 **independent mechanisms**

392 Our work demonstrates that in the absence of *hlh-3* function, the differentiation of  
393 proximal VCs is less affected than that of distal VCs. We have gained some insight into  
394 these differences with the analysis of markers that are expressed in early L4 versus  
395 later L4 substages (Figure 3). Expression of VC class and VC subclass-specific identity  
396 features *ida-1*, *glr-5*, and *mir-124*, is seen in VCs in early L4 substages in a WT context,  
397 yet, are completely absent from these early substages through adulthood in animals  
398 that lack *hlh-3* function (Figure 3, Figure 5, Figure 8A, Supplemental Figure 2). This  
399 indicates *hlh-3* function is required before L4 development. We also learned that in the  
400 mutant context, and during later stages of L4 development, expression of these VC  
401 identity features appeared in just a few VCs, the proximal ones. This suggests that there  
402 may be a parallel pathway, which can promote VC differentiation. Since the proximal  
403 VCs are less affected in their expression of the terminal identity genes that arise after  
404 mid-L4 development (*unc-4* and *unc-17*), we propose that this alternative pathway acts  
405 by mid L4 but not sooner. We infer that the *hlh-3* independent parallel pathway is  
406 mediated by EGF, a cue secreted as early as mid L4, already shown to be required for  
407 expression of *unc-4* in proximal VCs (Figure 8B; Zheng et al., 2013). The presence of  
408 this parallel pathway could ensure that at least proximal VCs retain some function, as  
409 they are primary contributors to egg-laying by providing feedback to HSNs and vulva  
410 muscles (Schafer, 2006).

411 In summary, we have found that the acquisition of VC class features (shown  
412 herein) is impaired in *hlh-3 (lf)* individuals. Of the features we have analyzed, only one  
413 subclass differentiation feature, expression of *mir-124*, is fully dependent on *hlh-3*  
414 function (Figure 5C, Figure 8A). Since *mir-124* expression is restricted to the VC  
415 proximal subclass, it may have a role in promoting VC subclass diversity. However,  
416 since the expression of *mir-124*, is seen prior to the EGF cue, and is completely absent  
417 in *hlh-3 (lf)*, we believe that it is regulated by *hlh-3* and not by the EGF-dependent  
418 pathway. Further work has to address whether *mir-124* functions as an intrinsic, cell-  
419 autonomous mechanism to promote VC class diversity.

420 With this work, we propose that: (1) *hlh-3* functions cell-autonomously to specify  
421 VC class fate early in development (from L1 to L4) and (2) during L4 development an  
422 EGF-dependent cue promotes proximal VC subclass fate diversity for function in egg-  
423 laying. Our proposal is consistent with the observation that expression of *lin-11*, *glr-5*,  
424 *ida-1*, and *unc-4*, in the proximal VCs, is not significantly altered in the absence of *hlh-3*  
425 function. To reiterate, the proposed *hlh-3* dependent pathway specifies VC class fate  
426 and an *hlh-3* independent pathway promotes VC subclass diversity.

427

428 **The LIM homeodomain transcription factor LIN-11 in VCs is downstream of and**  
429 **positively regulated by *hlh-3***

430 As shown by others, the gene encoding LIN-11 is expressed from L2 through adulthood  
431 (Hobert et al., 1998). We have observed this as well with the translational reporter  
432 *wgls62 (lin-11::TY1::EGFP::3xFLAG + unc-119(+))* (data not shown). Since our analysis  
433 indicates that *hlh-3* is expressed before *lin-11*, we characterized the expression of a *lin-*

434 *lin-11* transcriptional reporter (*plin-11::mCherry*) in the absence of *hlh-3* function. We  
435 showed that *hlh-3 (lf)* mutants exhibit reduced *lin-11* transcriptional activity in VCs  
436 (Figure 7). It is likely that *hlh-3* directly targets *lin-11*, but further work will determine  
437 whether this effect is indirect or indirect. Interestingly, the ortholog ASCL1 has been  
438 shown to directly target the *lin-11* ortholog, Lhx1, in a ChIP-seq analysis of the ventral  
439 telencephalon (Castro et al., 2011; Kim et al., 2018).

440 Our analysis of *lin-11* expression in *hlh-3 (lf)* also revealed that the proximal VCs  
441 are less affected than the distal VCs by the absence of *hlh-3* function (Figure 7, Figure  
442 8A). The proximal VCs express *plin-11::mCherry* at higher proportions than the distal  
443 VCs. This prompted us to ask whether the presence of *lin-11* transcriptional activity is  
444 dependent on a secondary pathway other than one that is mediated by *hlh-3*. Given that  
445 others have shown *lin-11* acts downstream of EGF, *lin-11* may be targeted by both a  
446 *hlh-3* dependent pathway and this secondary EGF-dependent pathway (Figure 8B;  
447 Zheng et al., 2013).

448 We propose that the reason *lin-11* transcriptional activity is observed in the  
449 proximal VCs of *hlh-3 (lf)* individuals is that EGF-dependent signaling is acting in  
450 parallel to *hlh-3*. It is known that the proximal VCs acquire this subclass-specific identity  
451 feature (*unc-4*) in a time-dependent manner, occurring after EGF signaling, after mid-L4  
452 development (Zheng et al., 2013). Our analysis suggests the EGF signaling pathway  
453 promotes *lin-11* transcription too. This would explain why, in the absence of *hlh-3*, there  
454 is still expression of *lin-11* (Figure 7). Lastly, our findings that *hlh-3 (lf)* mutants also  
455 exhibit reduced *unc-4* transcriptional activity in the proximal VCs is a logical  
456 consequence of lower *lin-11* expression in the proximal VCs (Figure 4E, Figure 8A). Our

457 model shows that two pathways affect the expression of *lin-11* and other VC identity  
458 genes (Figure 8).

459

#### 460 ***hlh-3* may be a terminal selector of VC fate**

461 *hlh-3* meets several criteria to be classified as a gene encoding a terminal selector, in  
462 the VCs First, it is expressed from the birth to the maturation of all VC features. Second,  
463 in its absence, all known VC class terminal identity features fail to be acquired. Lastly, it  
464 functions cell-autonomously. Since more than one terminal selector can function to  
465 regulate downstream effector genes, it is possible that another terminal selector may  
466 function with *hlh-3*. To confirm if *hlh-3* is a terminal selector, additional work will need to  
467 test for the direct regulation of VC identity genes by *hlh-3*.

468

## 469 **MATERIALS AND METHODS**

### 470 **Strain maintenance**

471 All strains were maintained at 22°C on nematode growth media using standard  
472 conditions (Brenner, 1974). Some strains were provided by the CGC, which is funded  
473 by NIH Office of Research Infrastructure Programs (P40 OD010440). *hlh-3 (tm1688)*  
474 was isolated by the National Bioresource Project of Japan. *cccls1* was kindly shared by  
475 Dr. Jennifer Ross Wolf, *uls45* was kindly shared by Dr. Martin Chalfie, *otls456* was  
476 kindly shared by Dr. Oliver Hobert, and *otls564* was kindly shared by Dr. Paschalis  
477 Kratsios. See Supplementary Table 1 for a complete list of strains used in this study.

478

### 479 **Construction of transgenic strains**

480 The transgenic strain harboring *icls270* was generated by the integration of *akEx31*  
481 [*pglr-5::gfp + lin-15(+)*] using UV-TMP treatment followed by outcrossing (see below).  
482 The VC rescue array *icEx274* [*VC::hlh-3cDNA::GFP; pmyo-2::mCherry*] was generated  
483 by co-injection of the constructs pCFJ90 (*pmyo-2::mCherry*) and pRD2 (*VC::hlh-*  
484 *3cDNA::GFP*) into the mutant strain harboring *hlh-3 (tm1688); otIs45* at 20 ng/microliter  
485 and 2 ng/microliter, respectively. pRD2 was generated by Dr. Ryan Doonan to address  
486 whether *hlh-3* could rescue the egg-laying defective phenotype in *hlh-3 (tm1688)*  
487 (Doonan, 2006). The pRD2 construct contains a VC specific promoter obtained from the  
488 vector pDM4, kindly provided by Dr. Michael Koelle driving expression of a *hlh-3* cDNA  
489 (Doonan, 2006).

490

#### 491 **Integration of extrachromosomal arrays**

492 The transgenic strain harboring *icls270* was generated by exposing L4 hermaphrodites  
493 to UV-TMP (350microJoules x 100 on Stratagene UV Stratalinker;  
494 0.03microgram/microliter TMP. Irradiated animals were placed onto seeded NGM plates  
495 and transferred the next day to fresh seeded NGM plates (3 Po/plate). These were  
496 followed to clone F1s (~150) and subsequently to clone three F2s per F1.

497

#### 498 **Construction of HLH-3::GFP CRISPR-Cas-9 engineered line [ic272]**

499 Construction of the CRISPR line required modification of two plasmids: the single guide  
500 RNA or sgRNA plasmid, pDD162 (Addgene #47549), and the repair template plasmid,  
501 pDD282 (Addgene #66823) (Dickinson et al., 2015). The target sequence  
502 GCTATGATGATCACCAGAAG was selected using the CRISPR design tool on Flybase

503 consisting of a high optimal quality score (96). The sgRNA was cloned into pDD162 to  
504 create pLP1. The 5'arm homology arm was designed as a gBlock containing a silent  
505 mutation at the PAM site to prevent Cas-9 off-targeting. The gBlock was PCR amplified  
506 with primers acgttgtaaaacgacggccagtcgccggca and  
507 CATCGATGCTCCTGAGGCTCCCGATGCTCC and cloned into pDD282. The 3'  
508 homology arm was designed via PCR using the primers  
509 CGTGATTACAAGGATGACGATGACAAGAGATAATCTGTTAAGTTGTACC and  
510 ggaaacagctatgaccatgttatcgattccaaggagctggtgcacaag. The PCR product was purified  
511 and cloned into pDD282 to create pLP2. The modified constructs pLP1and pLP2, as  
512 well as the co-injection plasmid pGH8 (Addgene #19359) were co-injected into an N2  
513 strain: sg-RNA plasmid (pLP1) at 50ng/uL; *h1h-3* repair template plasmid (pLP2) at  
514 10ng/uL, and pGH8 at 2.5ng/uL. Screening was carried out according to the published  
515 protocol (Dickinson et al., 2015).

516

## 517 **Microscopy**

518 Animals were mounted on 3% agarose pads containing droplets of 10mM levamisole.  
519 Fluorescent images were acquired with AxioVision on Zeiss Axioskop 2 microscope.  
520 Following the collection of images, some conversions were made with FIJI version 2.0.0  
521 (grayscale images were converted with Lookup tables: Red or Green) and processed  
522 into Adobe Illustrator for formatting. Fluorescent reporters were observed under  
523 confocal microscopy for the detection of a fluorescent protein signal (presence or  
524 absence) in transgenic lines. This study does not report quantification of intensity for  
525 any fluorescent reporter observed.

526

527  
528  
529  
530  
531  
532  
533  
534  
535  
536  
537  
538  
539  
540  
541  
542  
543  
544  
545  
546  
547  
548  
549

## ACKNOWLEDGMENTS

We would like to acknowledge Freddy Jacome, Basil Muhana, and Alex Obafemi for help in data acquisition; Dr. Suzanne McCutcheon for imaging equipment; and the National Science Foundation Bridge to the Doctorate Fellowship as well as the Department of Biological Sciences for support of LMP. We thank Martin Chalfie, Oliver Hobert, Paschalis Kratsios, and Jennifer Wolff for kindly sharing strains. We are also grateful to Kimberly Goodwin for their comments on the manuscript.



550 **FIGURE LEGENDS:**

551 **Figure 1: The ventral cord type C motor neuron class**

552 **A:** Illustration of the position of the six VCs along the ventral nerve cord in the midbody  
553 region of an adult hermaphrodite. Anterior is to the left, ventral is down, gray triangle on  
554 the ventral surface indicates the location of the vulva.

555 **B:** Diagram of the reiterative post-embryonic cell divisions produced by the P3.a to P8.a  
556 neuroblasts and give rise to the VCs (adapted from Sulston and Horvitz, 1977)

557 **C:** Diagram for VC classification includes two sub-classes: proximal (VC 4 and VC 5)  
558 and distal (VCs 1-3, 6). This classification format will be used throughout the rest of the  
559 figures.

560

561 **Figure 2: HLH-3 is first detected in nuclei of the Pn descendants (Pn.a and Pn.p)**  
562 **and becomes restricted to the nuclei of VCs as development proceeds**

563 **A:** Diagram of the CRISPR-Cas9 engineered C-terminal GFP insertion at the *hlh-3*  
564 locus (*ic271*).

565 **B:** The *hlh-3 (tm1688)* allele represents a 1242 bp deletion that spans chromosome II  
566 from 35,589 to 36,831 and removes exon 1. Removal of this region, including most of  
567 the bHLH domain, results in a null allele (Doonan et al., 2008).

568 **C:** Representative images of the midbody ventral cord of hermaphrodites harboring  
569 HLH-3::GFP (*ic271*) at different larval developmental stages (L1, L2, and L3). At L1,  
570 filled arrowheads point to larger, more intense nuclei, presumably the Pn.a blast cells;  
571 whereas the outlined arrowheads point to the diminishing expression in Pn.p blast cells

572 (left panel). Filled arrowheads in L2 and L3 represent expression in VC nuclei (middle  
573 and right panels).

574 **D:** Representative images of the midbody ventral cord of hermaphrodites harboring  
575 HLH-3::GFP (*ic271*) over distinct L4 developmental stages (early, mid, and late). Larval  
576 substages (top panels) are classified by vulva morphology (Mok et al., 2015). Filled  
577 arrowheads point to the proximal VCs (bottom panels).

578 **E:** Overlapping expression (merge, top right) of the VC marker, *plin-11::mCherry*  
579 (*otIs456*) (bottom left) and HLH-3::GFP (*ic271*) (top left), in an animal at the L4 molt  
580 (bottom right). Filled arrowheads point to co-labeled proximal VCs.

581

582 **Figure 3. The spatiotemporal expression of VC class and subclass-specific**  
583 **identity features is dynamic**

584 **A:** Expression pattern of the VC class differentiation feature *ida-1* in early and mid-late  
585 L4 developmental stages. Image shows an early L4 hermaphrodite expressing *inIs179*  
586 [*pida-1::gfp*] in all VCs (indicated by arrowheads). Graphs report the percent of animals  
587 expressing *inIs179* [*pida-1::gfp*] (early L4, n = 20; mid-late L4, n = 40) in each VC. Since  
588 all VCs express *pida-1::gfp* by mid-L4, the sub-stages in late L4 were grouped together  
589 with mid-L4 substages.

590 **B:** Expression pattern of the VC class differentiation feature *glr-5* in early and late L4  
591 development. Image shows an early L4 hermaphrodite expressing *icIs270* [*pglr-5::gfp*]  
592 in the proximal VCs (indicated by arrowheads). Graphs report the percent of animals  
593 expressing *icIs270* in early L4 (n = 10), mid L4 (n = 15), and late L4 (n = 15)  
594 developmental stages in each VC.

595 **C:** Quantification of expression of the VC subclass feature, *unc-4*, from L4 development  
596 through adulthood. Image shows the expression of *uls45 [punc-4::MDM2::GFP]* in an  
597 adult (indicated by arrowheads). The percent of animals expressing the VC subclass  
598 marker in both cells (VC 4 and VC 5) of early L4 (n = 8), late L4 (n = 12), and adults (n =  
599 19).

600 **D:** Quantification of expression of VC subclass feature, *mir-124*, from L4 development  
601 to adulthood. Image shows expression of *mjls27 [mir-124p::gfp + lin-15(+)]* in the  
602 proximal VCs of an early L4 hermaphrodite. Percent of animals expressing the VC  
603 subclass marker in both cells during these substages is listed adjacent to the image in  
604 early L4 (n = 8), late L4 (n = 13), and adults (n = 10).

605

#### 606 **Figure 4: Summary of VC class and subclass identity**

607 **A:** Diagram of genes encoding transcription factors (TFs) and class- or subclass-  
608 specific features and structures expressed in VCs throughout post-embryonic  
609 development.

610 **B:** Summary of the expression pattern of distinct VC class and VC subclass identity  
611 features in the midbody of the ventral cord of the hermaphrodite. While *unc-17* is  
612 expressed in the subclass proximal VCs, it is also expressed in all VNC cholinergic  
613 motor neurons, therefore not VC specific. Our analysis is based on the expression of  
614 integrated transcriptional reporters with the exception of the endogenous GFP tag to  
615 *hlh-3* (See Supplemental Table 1 for the list of strains containing these markers). With  
616 the exception of *mir-124*, all reported features are maintained through adulthood.

617

618 **Figure 5. VCs require HLH-3 to acquire class-specific and subclass-specific**  
619 **differentiation features and normal axon morphology.**

620 **A-B:** Representative images of WT or *hlh-3 (lf)* individuals harboring the indicated  
621 reporters. Filled arrowheads point to detectable VCs in either genotype. Graphs report  
622 the percent of animals expressing each reporter in each VC of WT (gray bars) and *hlh-3*  
623 (*lf*) (red bars). The expression of the *ida-1* marker (*inls179*) was quantified in WT (n =  
624 15) and *hlh-3 (lf)* (n = 35) (panel A). The expression of the *glr-5* marker (*icls270*) was  
625 quantified in WT (n = 15) and *hlh-3 (lf)* (n = 30) (panel B).

626 **C-D:** Representative images of WT and mutant hermaphrodites at different stages of  
627 development and harboring the indicated reporters of VC subclass features *mir-124*  
628 (*mjls27*) and *unc-4 (uls45)*. Fluorescent images of the vulval region of DIC imaged  
629 hermaphrodites (top panels) only revealed expression in the proximal VCs of WT  
630 individuals (indicated by filled arrowheads). Quantification of the percent of animals with  
631 detectable reporter expression of *mir-124 (mjls27)* in VC 4 or VC 5 is reported in the  
632 graph below the images. Fluorescence was either detectable (on) or not detectable (off)  
633 for expression of *mjls27* in WT mid L4s (n = 17) and *hlh-3 (lf)* mid L4s (n = 14).  
634 Quantification of the percent of animals with detectable reporter expression of *uls45* in  
635 VC 4 or VC 5 is reported in the graph below the images. Fluorescence was either bright  
636 (on), dim, or not detectable (off) for expression of *uls45* in WT (n = 66) and *hlh-3 (lf)* (n =  
637 61) adults.

638 **E:** Quantification of proximal VC axon branching in WT and *hlh-3 (lf)* individuals. Normal  
639 axons branch into a vulval ring, as observed with *uls45* in the WT genotype (top panel).  
640 In contrast, *hlh-3 (lf)* hermaphrodites display abnormal axon branching (bottom panel).

641 The numbers to the right represent the percent of individuals with abnormal branching in  
642 adult WT (n = 15) and *hlh-3(lf)* (n = 24) adult hermaphrodites.

643

644 **Figure 6. VCs do not inappropriately undergo programmed cell death (PCD) in the**  
645 **absence of *hlh-3* function.**

646 **A:** Diagram of outcome in the presence and absence of *ced-3* function. The presence of  
647 *ced-3* function in WT individuals results in PCD, the absence of *ced-3* function in the  
648 null allele *ced-3 (n717)* prevents PCD. In the ventral nerve cord of WT animals, only the  
649 descendants of P3.aap to P8.aap or VCs report the expression of VC markers.

650 However, in *ced-3 (n717)* nulls, the VC-equivalent descendants of P1 and P9-12, that  
651 normally undergo PCD, do not undergo PCD and report expression of VC markers.

652 **B:** Representative images of *ced-3 (n717); unc-26 (e244)* individuals with (WT), or  
653 without (*hlh-3 (lf)*) function. The *glr-5* VC marker (*icls270*) was utilized to monitor the  
654 presence of VCs (filled arrowheads) and VC-like surviving cells (outlined arrowheads;  
655 specifically, P2.aap and P9.aap). The reporter *icls270* is only detected in the proximal  
656 VCs (filled arrowheads) and a VC-like cell (outlined arrowhead; P2.aap) in the double  
657 mutant *hlh-3 (lf); ced-3 (lf)*.

658 **C:** Quantification of the percent of one day old adults expressing *icls270* in P2.aap in  
659 *ced-3 (n717); unc-26 (e244); pglr-5::gfp* (n = 35), and *hlh-3 (tm1668); ced-3 (n717); unc-*  
660 *26 (e244); pglr-5::gfp* (n = 34).

661 **D:** Quantification of the percent of one day old adults expressing *icls270* in each VC of  
662 *ced-3 (n717); unc-26 (e244); pglr-5::gfp* (n = 35) and *hlh-3 (tm1668); ced-3 (n717); unc-*  
663 *26 (e244); pglr-5::gfp* (n = 34).

664

665 **Figure 7. The function of *hlh-3* in VCs is cell-autonomous**

666 **A:** Representative images of individuals harboring the *lin-11* marker (*plin-11::mCherry*)  
667 in WT (top panel), *hlh-3 (lf)* (middle panel), and VC-specific rescued lines (bottom  
668 panel). The reporter *otIs456* is normally expressed in all VCs (top panel, filled  
669 arrowheads).

670 **B:** Quantification of the percent of mid-late L4 animals expressing *plin-11::mCherry* in  
671 each VC of WT (n = 41), *hlh-3 (lf)* (n = 48), and *hlh-3 (lf); VC::hlh-3cDNA::GFP* (n = 39).

672

673 **Figure 8. Two pathways promote the acquisition and maintenance of VC-class  
674 and VC-subclass features**

675 **A:** Expression of the VC identity features (*lin-11*, *ida-1*, *glr-5*, *mir-124*) require *hlh-3*  
676 function.

677 **B:** The regulation of the VC identity features occurs in a cell-autonomous way prior and  
678 independently of EGF signaling during mid-L4 development. The alternative pathway,  
679 dependent on EGF, regulates the expression of *unc-4* (Zheng et al., 2013). We propose  
680 that the function of EGF signaling adds a secondary input to regulate *lin-11* levels in the  
681 proximal VCs, and affect *unc-4* and *unc-17*, as well as other VC identity features.

682

683 **SUPPLEMENTARY INFORMATION**

684

685 **Supplementary Figure 1. Cholinergic, sex-shared ventral cord motor neurons  
686 differentiate normally in *hlh-3lf*.**

687 **A:** Schematic of the number and position of cholinergic, sex-shared VNC neurons in the  
688 anterior body region, and between VC 1 and VC 4 (n = 14).

689 **B:** An annotated image of adult WT hermaphrodite expressing *punc-17::gfp* in non-VC  
690 neurons (top panel), *plin-11::mCherry* in VCs (middle panel, filled arrowheads), and a  
691 merge of both images (bottom image). Anterior is left, ventral is down.

692 **C:** Quantification of number of *punc-17::gfp* positive nuclei in the anterior region of the  
693 vulva in WT (n = 10) and *hlh-3 (lf)* (n = 10) hermaphrodites. Representative images are  
694 shown on the left. The average number of positive nuclei is reported on the right for  
695 each genotype.

696 **D:** Representative images of L4 and adult WT hermaphrodites harboring the *punc-*  
697 *17::gfp (vsIs48)* reporter. There is no detectable expression in mid-L4 development (top  
698 panel), but the expression is detected in adults (middle and bottom panels).

699 **E:** Quantification of reporter expression in proximal VCs of WT (n = 16) and *hlh-3 (lf)* (n  
700 = 15) in adulthood. On = detectable, Off = undetectable.

701

## 702 **Supplementary Figure 2. *hlh-3* acts prior to early larval L4 substages.**

703 **A:** Image of an early L4 *hlh-3 (lf)* hermaphrodite expressing *pida-1::gfp* only in VC 5  
704 (white arrowhead). In WT individuals this reporter is detectable in all VCs (Figure 2) as  
705 well as the round-shaped bodies near the vulva, a pair of uv1 cells. Expression in uv1  
706 cells is not affected in *hlh-3 (lf)* individuals

707 **B:** Quantification analysis of *pida-1::gfp* detection in each VC of *hlh-3 (lf)* individuals  
708 during early L4 substages (L4.0-L4.3) or mid-late substages (L4.4-L4.9).

709

710 **Supplementary Figure 3. GABAergic, sex-shared, ventral cord motor neurons**  
711 **differentiate normally in *hlh-3 (lf)*.**

712 **A:** Illustration of the positions of the GABAergic VNC motor neurons scored (only VD 3  
713 through VD 11 were scored, n = 13).

714 **B:** Representative image of *unc-47* reporter expression (*otIs564 [unc-*  
715 *47fosmid::SL2::mChOpti::H2B; pha-1(+)]*) in a *hlh-3 (lf)* mutant individual in L4  
716 development. The gene *unc-47* encodes a vesicular GABA transporter; it marks  
717 GABAergic neurons in the VNC. Both WT and *hlh-3 (lf)* individuals express the *unc-47*  
718 marker (WT not shown).

719 **C:** Quantification of VNC neurons expressing *otIs564* reported as averages per  
720 genotype in one day old WT (n = 14) and *hlh-3 (lf)* (n = 14) hermaphrodites.

721

722 **Supplementary Figure 4. The differentiation of the male-specific ventral cord**  
723 **motor neurons derived from P cells is not affected by the absence of *hlh-3***  
724 **function**

725 **A:** Diagram of post-embryonic lineages in the ventral nerve cord that gives rise to CA  
726 and CP male-specific neurons. Notably, P2.a divisions give rise to CP0 but are not  
727 shown (adapted from Sulston et al., 1980).

728 **B:** Summary of the expression pattern of *ida-1::gfp* and *tph-1::mCherry* in CAs and CPs,  
729 respectively (based on data from Kalis et al., 2014; Loer & Kenyon, 1993).

730 **C:** Quantification of expression of *pida-1::gfp* in the adult male ventral cord of wild type  
731 and mutant individuals. Representative fluorescent images for each genotype (top).



732 Graph reports the percent of animals with detectable expression in each cell of WT (n =  
733 71) and *hlh-3 (lf)* (n = 61) males.

734 **D:** Quantification of expression of *ptph-1::mCherry* expression in the adult male ventral  
735 cord of wild type and mutant individuals. Representative fluorescent images for each  
736 genotype (top). Graph reports the percent of animals with detectable expression in each  
737 cell of WT (n = 20) and *hlh-3 (lf)* (n = 41) males.

738

739

740

## REFERENCES

741

Alfonso, A., Grundahl, K., Duerr, J. S., Han, H., & Rand, J. B. (1993). The

742

Caenorhabditis elegans unc-17 gene: A Putative Vesicular Acetylcholine

743

Transporter. *Science*, 261(5121), 617–619.

744

<https://doi.org/10.1126/science.8342028>

745

Allan, D. W., & Thor, S. (2015). Transcriptional selectors, masters, and combinatorial

746

codes: Regulatory principles of neural subtype specification. In *Wiley*

747

*Interdisciplinary Reviews: Developmental Biology* (Vol. 4, Issue 5, pp. 505–528).

748

John Wiley and Sons Inc. <https://doi.org/10.1002/wdev.191>

749

Baker, E. A., & Woollard, A. (2019). How Weird is The Worm? Evolution of the

750

Developmental Gene Toolkit in *Caenorhabditis elegans*. *Journal of Developmental*

751

*Biology*, 7(4), 19. <https://doi.org/10.3390/jdb7040019>

752

Brenner, S. (1974). The Genetics Of *Caenorhabditis elegans*. *Genetics*, 77(1), 71-94.

753

Brockie, P. J., Madsen, D. M., Zheng, Y., Mellem, J., & Maricq, A. V. (2001). Differential

754

expression of glutamate receptor subunits in the nervous system of *Caenorhabditis*

755

*elegans* and their regulation by the homeodomain protein UNC-42. *Journal of*

756

*Neuroscience*, 21(5), 1510–1522. [https://doi.org/10.1523/jneurosci.21-05-](https://doi.org/10.1523/jneurosci.21-05-01510.2001)

757

[01510.2001](https://doi.org/10.1523/jneurosci.21-05-01510.2001)

758

Cai, T., Fukushige, T., Notkins, A. L., & Krause, M. (2004). Insulinoma-Associated

759

Protein IA-2, A Vesicle Transmembrane Protein, Genetically Interacts with UNC-

760

31/CAPS and Affects Neurosecretion in *Caenorhabditis elegans*. *Journal of*

761

*Neuroscience*, 24(12), 3115–3124. [https://doi.org/10.1523/JNEUROSCI.0101-](https://doi.org/10.1523/JNEUROSCI.0101-04.2004)

762

[04.2004](https://doi.org/10.1523/JNEUROSCI.0101-04.2004)

- 763 Cai, T., Krause, M. W., Odenwald, W. F., Toyama, R., & Notkins, A. L. (2001). The IA-2  
764 gene family: Homologs in *Caenorhabditis elegans*, *Drosophila* and zebrafish.  
765 *Diabetologia*, *44*(1), 81–88. <https://doi.org/10.1007/s001250051583>
- 766 Castro, D. S., Martynoga, B., Parras, C., Ramesh, V., Pacary, E., Johnston, C.,  
767 Drechsel, D., Lebel-Potter, M., Garcia, L. G., Hunt, C., Dolle, D., Bithell, A.,  
768 Ettwiller, L., Buckley, N., & Guillemot, F. (2011). A novel function of the proneural  
769 factor *Ascl1* in progenitor proliferation identified by genome-wide characterization  
770 of its targets. *Genes and Development*, *25*(9), 930–945.  
771 <https://doi.org/10.1101/gad.627811>
- 772 Clark, A. M., Goldstein, L. D., Tevlin, M., Tavaré, S., Shaham, S., & Miska, E. A. (2010).  
773 The microRNA miR-124 controls gene expression in the sensory nervous system of  
774 *Caenorhabditis elegans*. *Nucleic Acids Research*, *38*(11), 3780–3793.  
775 <https://doi.org/10.1093/nar/gkq083>
- 776 Clark, S. G., Chisholm, A. D., & Robert Horvitz, H. (1993). Control of Cell Fates in the  
777 Central Body Region of *C. elegans* by the Homeobox Gene *lin-39*. *Cell* *74*, 43-55.
- 778 Conradt, B., Wu, Y. C., & Xue, D. (2016). Programmed cell death during *Caenorhabditis*  
779 *elegans* development. *Genetics*, *203*(4), 1533–1562.  
780 <https://doi.org/10.1534/genetics.115.186247>
- 781 Cooper, J. F., & Van Raamsdonk, J. M. (2018). Modeling Parkinson’s disease in *C.*  
782 *elegans*. In *Journal of Parkinson’s Disease* *8*(1), 17–32. IOS Press.  
783 <https://doi.org/10.3233/JPD-171258>
- 784 Corsi, A. K., Wightman, B., & Chalfie, M. (2015). A transparent window into biology: A  
785 primer on *Caenorhabditis elegans*. *Genetics*, *200*(2), 387–407.

- 786 <https://doi.org/10.1534/genetics.115.176099>
- 787 Dickinson, D. J., Pani, A. M., Heppert, J. K., Higgins, C. D., & Goldstein, B. (2015).  
788 Streamlined genome engineering with a self-excising drug selection cassette.  
789 *Genetics*, 200(4), 1035–1049. <https://doi.org/10.1534/genetics.115.178335>
- 790 Doonan, R., Hatzold, J., Raut, S., Conradt, B., & Alfonso, A. (2008). HLH-3 is a C.  
791 elegans Achaete/Scute protein required for differentiation of the hermaphrodite-  
792 specific motor neurons. *Mechanisms of Development*, 125(9–10), 883–893.  
793 <https://doi.org/10.1016/j.mod.2008.06.002>
- 794 Doonan, R. (2014). The role of the Achaete/Scute bHLH protein, HLH-3, in  
795 Caenorhabditis elegans neurogenesis. University of Illinois at Chicago, ProQuest  
796 Dissertations Publishing. 3248845.  
797 [https://indigo.uic.edu/articles/The\\_role\\_of\\_the\\_Achaete\\_Scute\\_bHLH\\_protein\\_HLH-3\\_in\\_Caenorhabditis\\_elegans\\_neurogenesis\\_/10792955](https://indigo.uic.edu/articles/The_role_of_the_Achaete_Scute_bHLH_protein_HLH-3_in_Caenorhabditis_elegans_neurogenesis_/10792955)
- 798
- 799 Duerr, J. S., Han, H.-P., Fields, S. D., & Rand, J. B. (2008). Identification of major  
800 classes of cholinergic neurons in the nematode Caenorhabditis elegans. *The*  
801 *Journal of Comparative Neurology*, 506(3), 398–408.  
802 <https://doi.org/10.1002/cne.21551>
- 803 Emmons, S. W. (2016). Connectomics, the Final Frontier. In *Current Topics in*  
804 *Developmental Biology* 116, 315–330. Academic Press Inc.  
805 <https://doi.org/10.1016/bs.ctdb.2015.11.001>
- 806 Feng, W., Li, Y., Dao, P., Aburas, J., Islam, P., Elbaz, B., Kolarzyk, A., Brown, A. E. X.,  
807 & Kratsios, P. (2020). A terminal selector prevents a Hox transcriptional switch to  
808 safeguard motor neuron identity throughout life. *ELife*, 9, 1–38.

- 809 <https://doi.org/10.7554/eLife.50065>
- 810 Freyd, G., Kim, S. K., & Horvitz, H. R. (1990). Novel cysteine-rich motif and  
811 homeodomain in the product of the *Caenorhabditis elegans* cell lineage gene *lin-II*.  
812 *Nature*, 344(6269), 876–879. <https://doi.org/10.1038/344876a0>
- 813 Gendrel, M., Atlas, E. G., & Hobert, O. (2016). A cellular and regulatory map of the  
814 GABAergic nervous system of *C. elegans*. *ELife*, 5, e17686  
815 <https://doi.org/10.7554/eLife.17686>
- 816 Gruner, M., Grubbs, J., McDonagh, A., Valdes, D., Winbush, A., & van der Linden, A. M.  
817 (2016). Cell-Autonomous and Non-Cell-Autonomous Regulation of a Feeding  
818 State-Dependent Chemoreceptor Gene via MEF-2 and bHLH Transcription  
819 Factors. *PLOS Genetics*, 12(8), e1006237.  
820 <https://doi.org/10.1371/journal.pgen.1006237>
- 821 Hammarlund, M., Hobert, O., Miller, D. M., & Sestan, N. (2018). The CeNGEN Project:  
822 The Complete Gene Expression Map of an Entire Nervous System. *Neuron* 99(3),  
823 430–433. Cell Press. <https://doi.org/10.1016/j.neuron.2018.07.042>
- 824 Hobert, O. (2016a). Terminal Selectors of Neuronal Identity. In *Current Topics in*  
825 *Developmental Biology* 116, 455–475. Academic Press Inc.  
826 <https://doi.org/10.1016/bs.ctdb.2015.12.007>
- 827 Hobert, O. (2016b). A map of terminal regulators of neuronal identity in *Caenorhabditis*  
828 *elegans*. *Wiley Interdisciplinary Reviews: Developmental Biology*, 5(4), 474–498.  
829 <https://doi.org/10.1002/wdev.233>
- 830 Hobert, O., D'Alberti, T., Liu, Y., & Ruvkun, G. (1998). Control of neural development  
831 and function in a thermoregulatory network by the LIM homeobox gene *lin-11*.

- 832 *Journal of Neuroscience*, 18(6), 2084–2096. <https://doi.org/10.1523/jneurosci.18->  
833 06-02084.1998
- 834 Hobert, O., & Kratsios, P. (2019). Neuronal identity control by terminal selectors in  
835 worms, flies, and chordates. In *Current Opinion in Neurobiology* 56, 97–105.  
836 Elsevier Ltd. <https://doi.org/10.1016/j.conb.2018.12.006>
- 837 Kalis, A. K., Kissiov, D. U., Kolenbrander, E. S., Palchick, Z., Raghavan, S., Tetreault,  
838 B. J., Williams, E., Loer, C. M., & Wolff, J. R. (2014). Patterning of sexually  
839 dimorphic neurogenesis in the *Caenorhabditis elegans* ventral cord by Hox and  
840 TALE homeodomain transcription factors. *Developmental Dynamics*, 243(1), 159–  
841 171. <https://doi.org/10.1002/dvdy.24064>
- 842 Kim, W., Underwood, R. S., Greenwald, I., & Shaye, D. D. (2018). Ortholist 2: A new  
843 comparative genomic analysis of human and *Caenorhabditis elegans* genes.  
844 *Genetics*, 210(2), 445–461. <https://doi.org/10.1534/genetics.118.301307>
- 845 Kratsios, P., Kerk, S. Y., Catela, C., Liang, J., Vidal, B., Bayer, E. A., Feng, W., De La  
846 Cruz, E. D., Croci, L., Giacomo Consalez, G., Mizumoto, K., & Hobert, O. (2017).  
847 An intersectional gene regulatory strategy defines subclass diversity of *C. Elegans*  
848 motor neurons. *ELife*, 6, 25751. <https://doi.org/10.7554/eLife.25751>
- 849 Krause, M., Park, M., Zhang, J. M., Yuan, J., Harfe, B., Xu, S. Q., Greenwald, I., Cole,  
850 M., Paterson, B., & Fire, A. (1997). A *C. elegans* E/Daughterless bHLH protein  
851 marks neuronal but not striated muscle development. *Development*, 124(11), 2179  
852 LP – 2189. <http://dev.biologists.org/content/124/11/2179.abstract>
- 853 Lickteig, K. M., Duerr, J. S., Frisby, D. L., Hall, D. H., Rand, J. B., & Miller, D. M. (2001).  
854 Regulation of neurotransmitter vesicles by the homeodomain protein UNC-4 and its

- 855 transcriptional corepressor UNC-37/groucho in *Caenorhabditis elegans* cholinergic  
856 motor neurons. *Journal of Neuroscience*, 21(6), 2001–2014.  
857 <https://doi.org/10.1523/jneurosci.21-06-02001.2001>
- 858 Liu, H., Strauss, T. J., Potts, M. B., & Cameron, S. (2006). Direct regulation of egl-1 of  
859 programmed cell death by the Hox protein MAB-5 and CEH-20, a *C. elegans*  
860 homolog of Pbx1. *Development*, 133(4), 641–650.  
861 <https://doi.org/10.1242/dev.02234>
- 862 Lloret-Fernández, C., Maicas, M., Mora-Martínez, C., Artacho, A., Jimeno-Martín, Á.,  
863 Chirivella, L., Weinberg, P., & Flames, N. (2018). A transcription factor collective  
864 defines the HSN serotonergic neuron regulatory landscape. *ELife*, 7, 32785.  
865 <https://doi.org/10.7554/eLife.32785>
- 866 Loer, C. M., & Kenyon, C. J. (1993). Serotonin-Deficient Mutants and Male Mating  
867 Behavior in the Nematode *Caenorhabditis elegans*. In *The Journal of*  
868 *Neuroscience*, 13(12), 5407-5417.
- 869 Luo, S., & Horvitz, H. R. (2017). The CDK8 Complex and Proneural Proteins Together  
870 Drive Neurogenesis from a Mesodermal Lineage. *Current Biology*, 27(5), 661–672.  
871 <https://doi.org/10.1016/j.cub.2017.01.056>
- 872 Mok, D. Z. L., Sternberg, P. W., & Inoue, T. (2015). Morphologically defined sub-stages  
873 of *C. elegans* vulval development in the fourth larval stage. *BMC Developmental*  
874 *Biology*, 15(1). <https://doi.org/10.1186/s12861-015-0076-7>
- 875 Murgan, S., Kari, W., Rothbacher, U., Iché-Torres, M., Méléneç, P., Hobert, O., &  
876 Bertrand, V. (2015). Atypical Transcriptional Activation by TCF via a Zic  
877 Transcription Factor in *C. elegans* Neuronal Precursors. *Developmental Cell*, 33(6),

- 878 737–745. <https://doi.org/10.1016/j.devcel.2015.04.018>
- 879 Pereira, L., Kratsios, P., Serrano-Saiz, E., Sheftel, H., Mayo, A. E., Hall, D. H., White, J.  
880 G., LeBoeuf, B., Garcia, L. R., Alon, U., & Hobert, O. (2015). A cellular and  
881 regulatory map of the cholinergic nervous system of *C. Elegans*. *ELife*, *4*, 12432.  
882 <https://doi.org/10.7554/eLife.12432>
- 883 Potts, M. B., Wang, D. P., & Cameron, S. (2009). Trithorax, Hox, and TALE-class  
884 homeodomain proteins ensure cell survival through repression of the BH3-only  
885 gene *egl-1*. *Developmental Biology*, *329*(2), 374–385.  
886 <https://doi.org/10.1016/j.ydbio.2009.02.022>
- 887 Raut, S. (2017). *Functional Analysis of HLH-3, a bHLH Achaete/Scute Protein, in HSN*  
888 *Maturation*. University of Illinois at Chicago, ProQuest Dissertations Publishing.  
889 10644549. [https://indigo.uic.edu/articles/Functional\\_Analysis\\_of\\_HLH-](https://indigo.uic.edu/articles/Functional_Analysis_of_HLH-3_a_bHLH_Achaete_Scute_Protein_in_HSN_Maturation/10824206)  
890 [3\\_a\\_bHLH\\_Achaete\\_Scute\\_Protein\\_in\\_HSN\\_Maturation/10824206](https://indigo.uic.edu/articles/Functional_Analysis_of_HLH-3_a_bHLH_Achaete_Scute_Protein_in_HSN_Maturation/10824206)
- 891 Salser, S. J., Loer, C. M., & Kenyon, C. (1993). Multiple HOM-C gene interactions  
892 specify cell fates in the nematode central nervous system. *Genes and*  
893 *Development*, *7*(9), 1714–1724. <https://doi.org/10.1101/gad.7.9.1714>
- 894 Schafer, W. R. (2006). Genetics of Egg-Laying in Worms. *Annual Review of Genetics*,  
895 *40*(1), 487–509. <https://doi.org/10.1146/annurev.genet.40.110405.090527>
- 896 Stefanakis, N., Carrera, I., & Hobert, O. (2015). Regulatory Logic of Pan-Neuronal Gene  
897 Expression in *C. elegans*. *Neuron*, *87*(4), 733–750.  
898 <https://doi.org/10.1016/j.neuron.2015.07.031>
- 899 Sulston, J. E., Albertson, D. G., & Thomson, J. N. (1980). The *Caenorhabditis elegans*  
900 male: Postembryonic development of nongonadal structures. *Developmental*



901 *Biology*, 78(2), 542–576. [https://doi.org/10.1016/0012-1606\(80\)90352-8](https://doi.org/10.1016/0012-1606(80)90352-8)

902 Sulston, J. E., & Horvitz, H. R. (1977). Post-embryonic cell lineages of the nematode,  
903 *Caenorhabditis elegans*. *Developmental Biology*, 56(1), 110–156.  
904 [https://doi.org/10.1016/0012-1606\(77\)90158-0](https://doi.org/10.1016/0012-1606(77)90158-0)

905 Thellmann, M., Hatzold, J., & Conradt, B. (2003). The Snail-like CES-1 protein of *C.*  
906 *elegans* can block the expression of the BH3-only-cell-death activator gene *egl-1*  
907 by antagonizing the function of bHLH proteins. In *Development* 130(17), 4057–  
908 4071). <https://doi.org/10.1242/dev.00597>

909 Zahn, T. R., Macmorris, M. A., Dong, W., Day, R., & Hutton, J. C. (2001). IDA-1, a  
910 *Caenorhabditis elegans* homolog of the diabetic autoantigens IA-2 and phogrin, is  
911 expressed in peptidergic neurons in the worm. *Journal of Comparative Neurology*,  
912 429(1), 127–143. [https://doi.org/10.1002/1096-9861\(20000101\)429:1<127::AID-](https://doi.org/10.1002/1096-9861(20000101)429:1<127::AID-CNE10>3.0.CO;2-H)  
913 [CNE10>3.0.CO;2-H](https://doi.org/10.1002/1096-9861(20000101)429:1<127::AID-CNE10>3.0.CO;2-H)

914 Zheng, C., Karimzadegan, S., Chiang, V., & Chalfie, M. (2013). Histone Methylation  
915 Restrains the Expression of Subtype-Specific Genes during Terminal Neuronal  
916 Differentiation in *Caenorhabditis elegans*. *PLOS Genetics*, 9(12), e1004017.  
917 <https://doi.org/10.1371/journal.pgen.1004017>

918

919

920

921

922

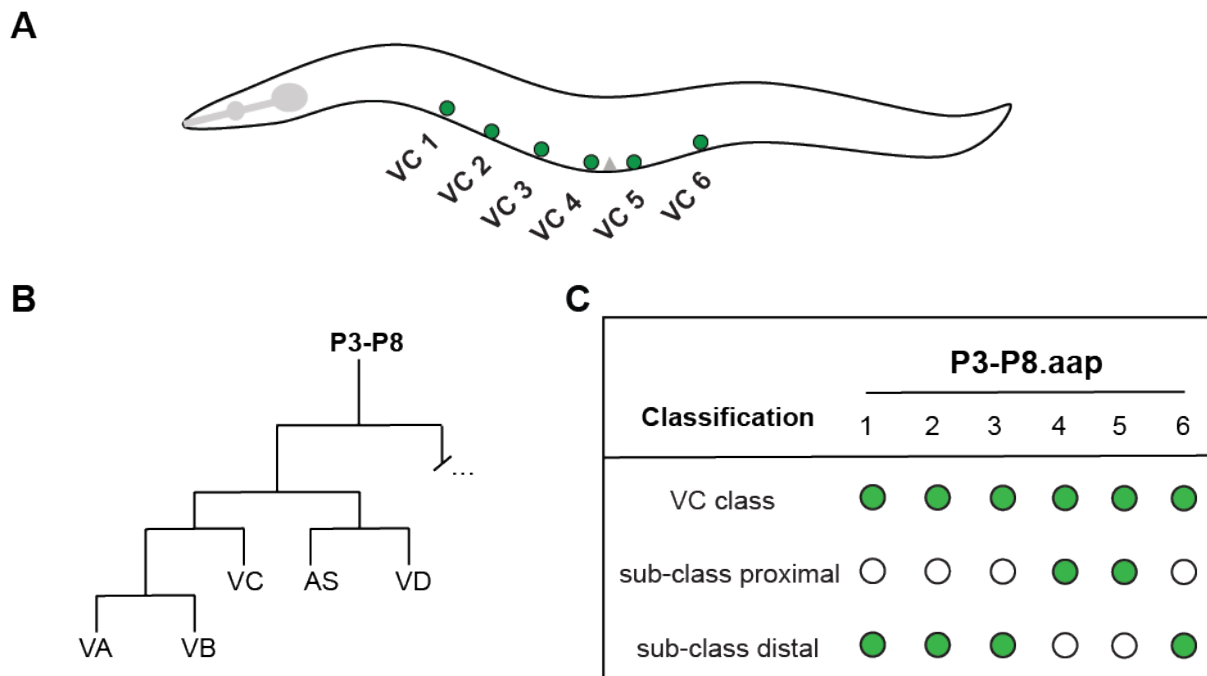

Figure 1. The ventral cord type C motor neuron class

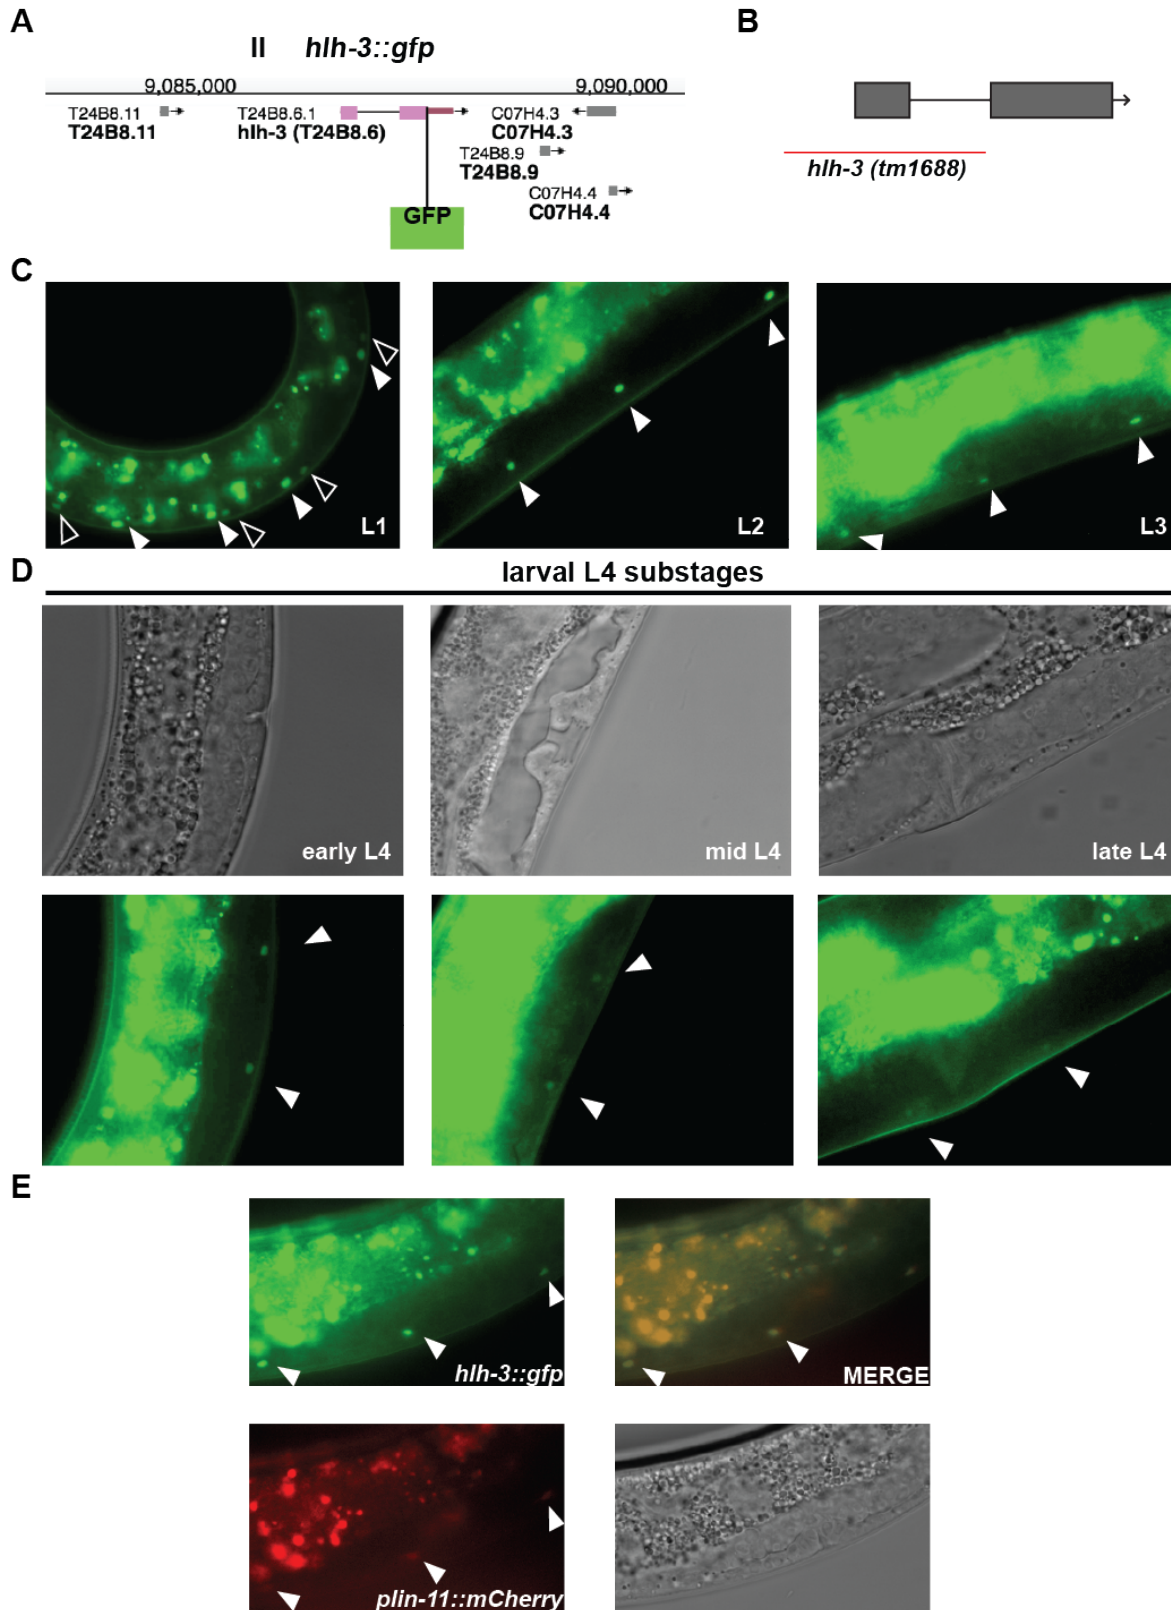

Figure 2. HLH-3 is first detected in nuclei of the Pn descendants (Pn.a and Pn.p) and becomes restricted to the nuclei of VCs as development proceeds

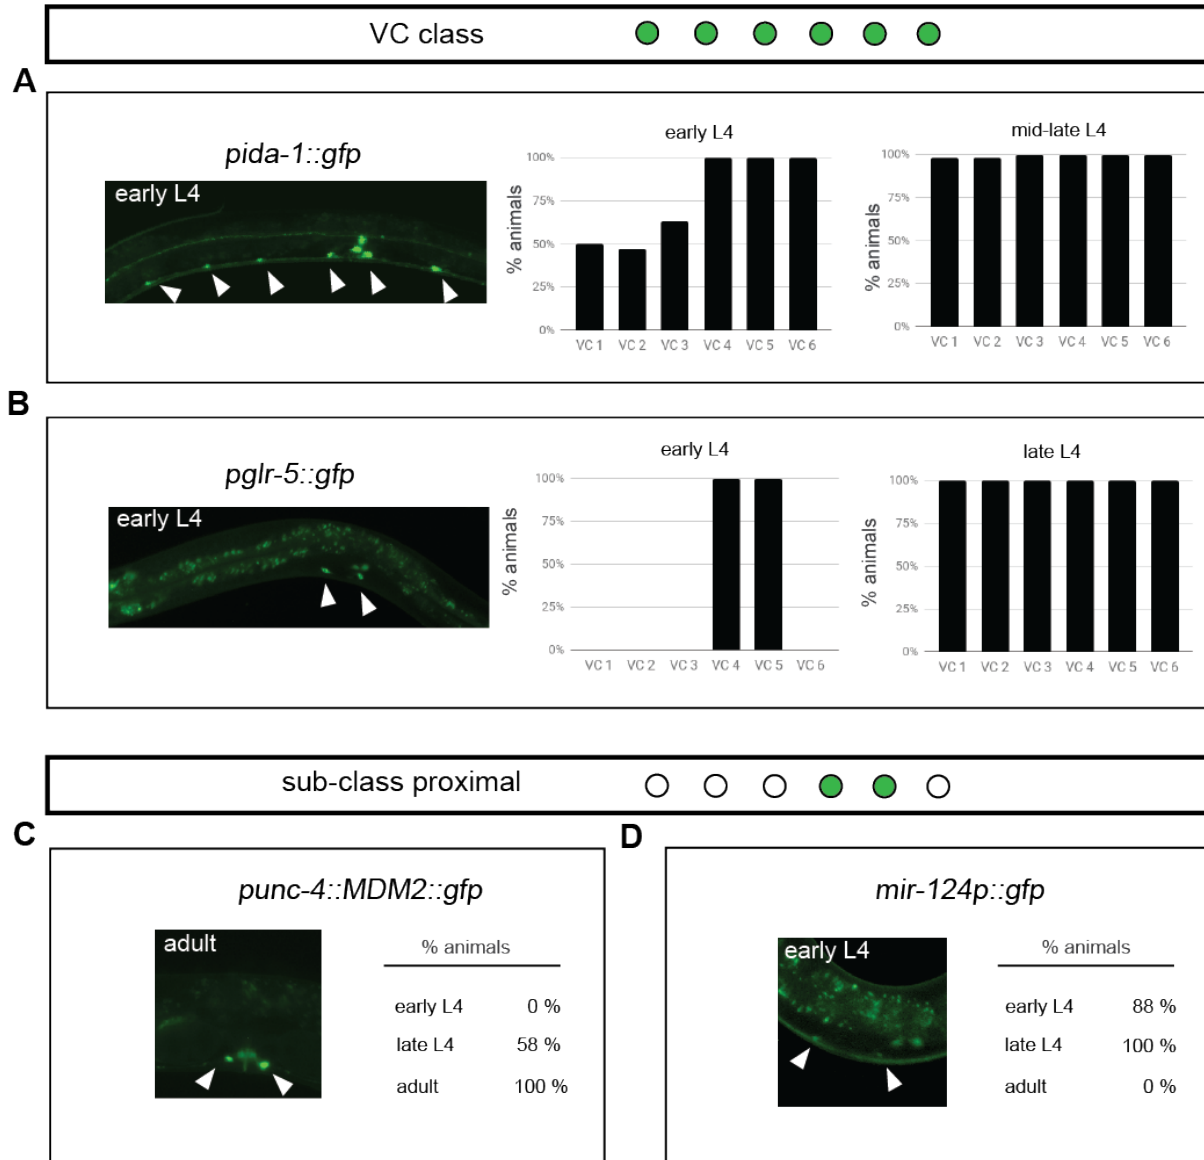

Figure 3. The spatiotemporal expression of VC class and subclass-specific identity features is dynamic

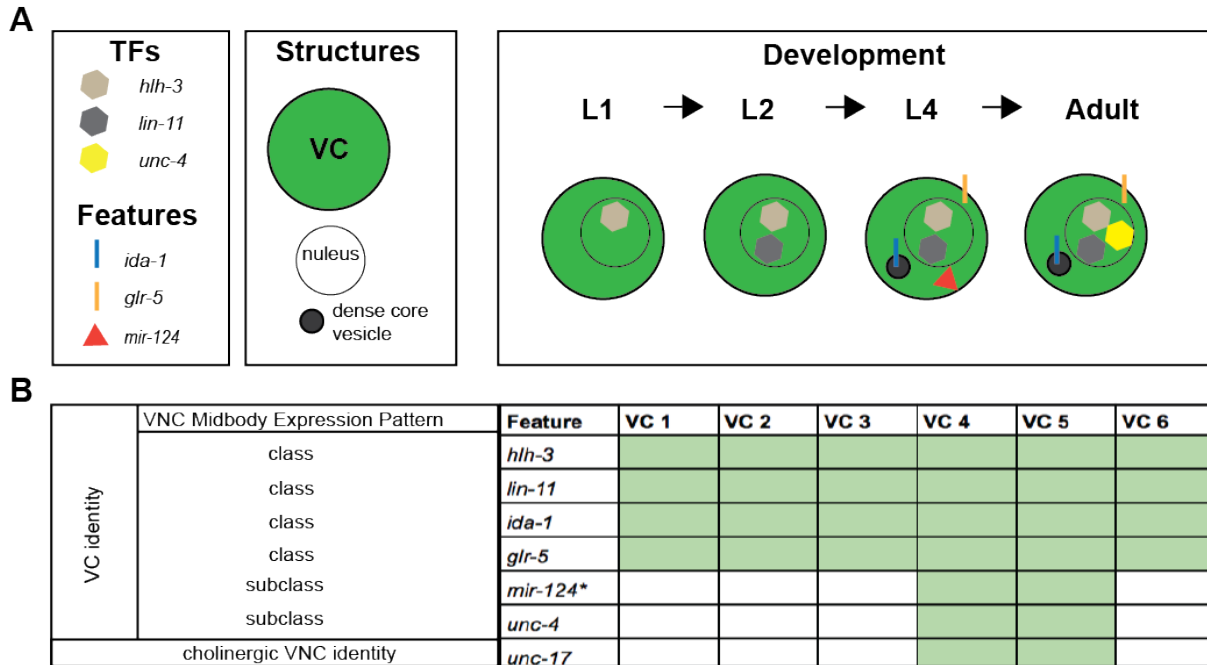

Figure 4: Summary of VC class and subclass identity

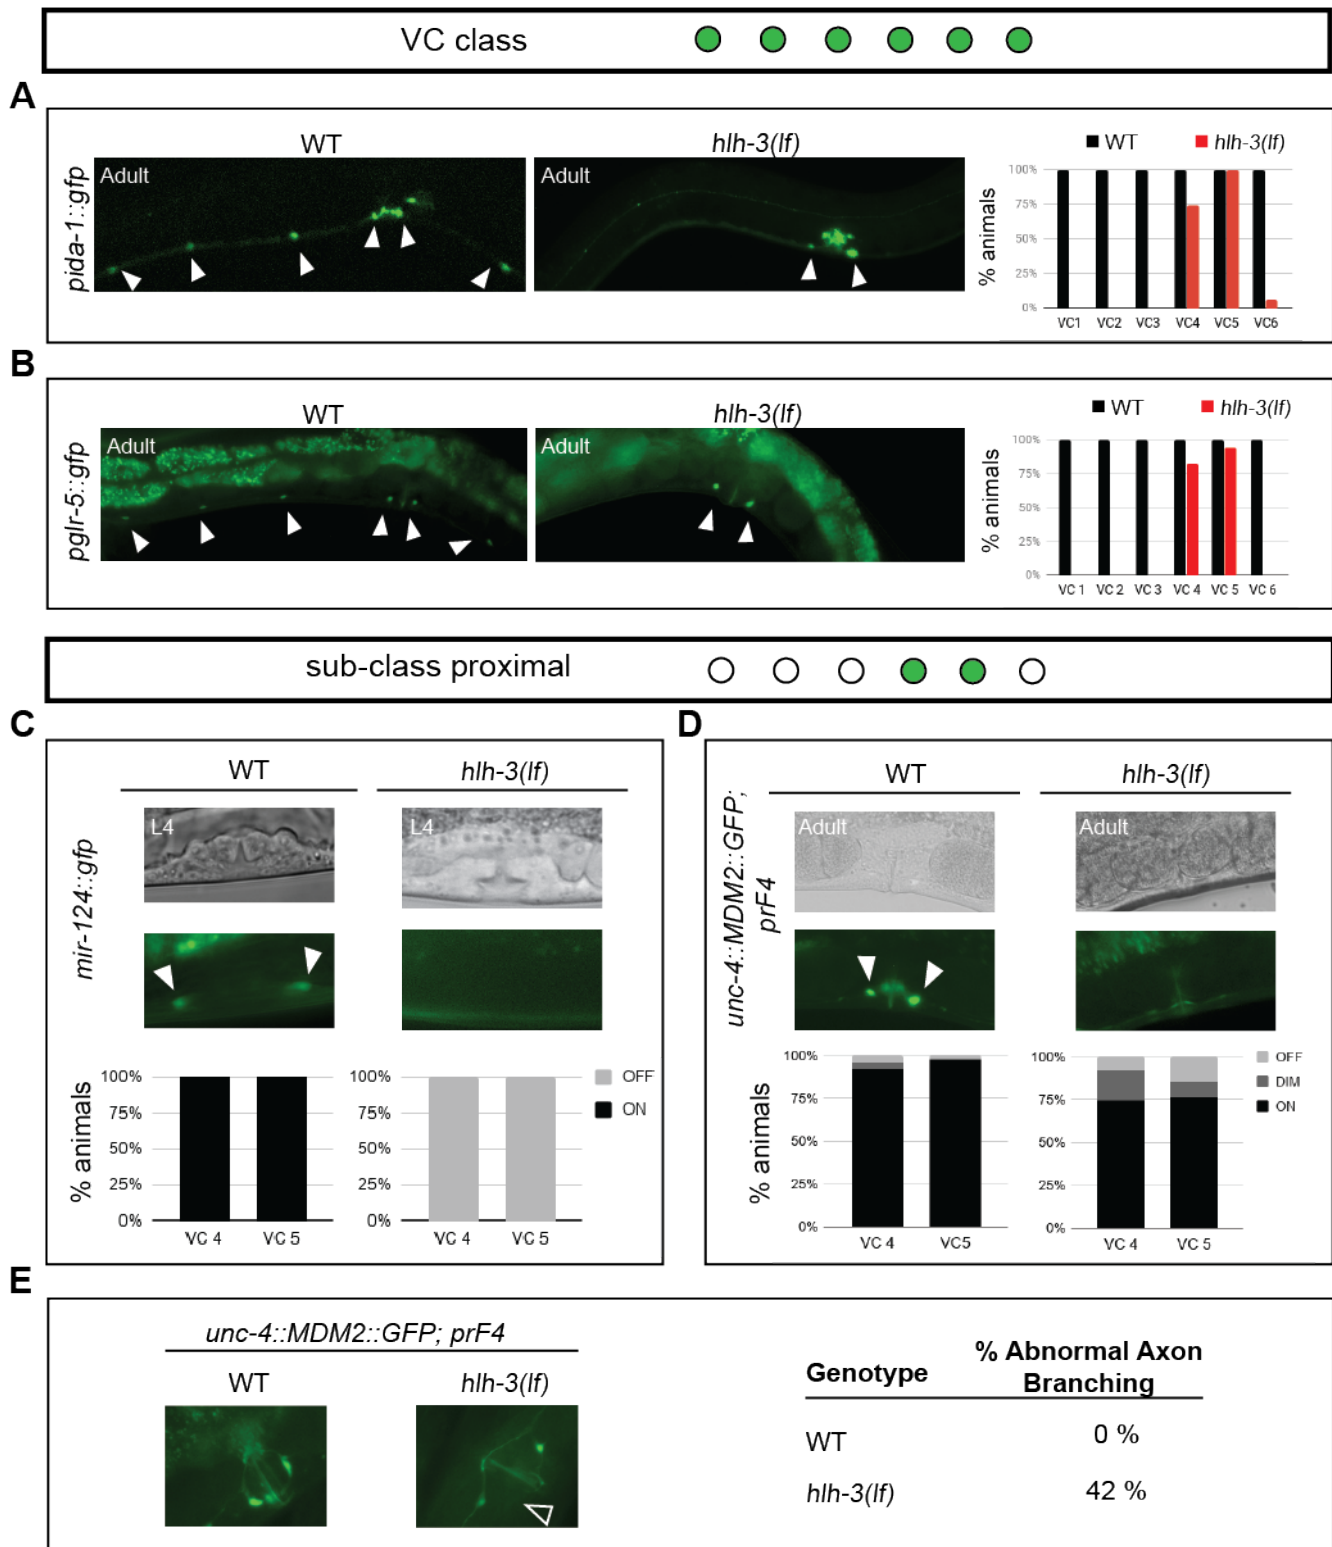

Figure 5. VCs require HLH-3 to acquire class-specific and subclass-specific differentiation features and normal axon morphology.

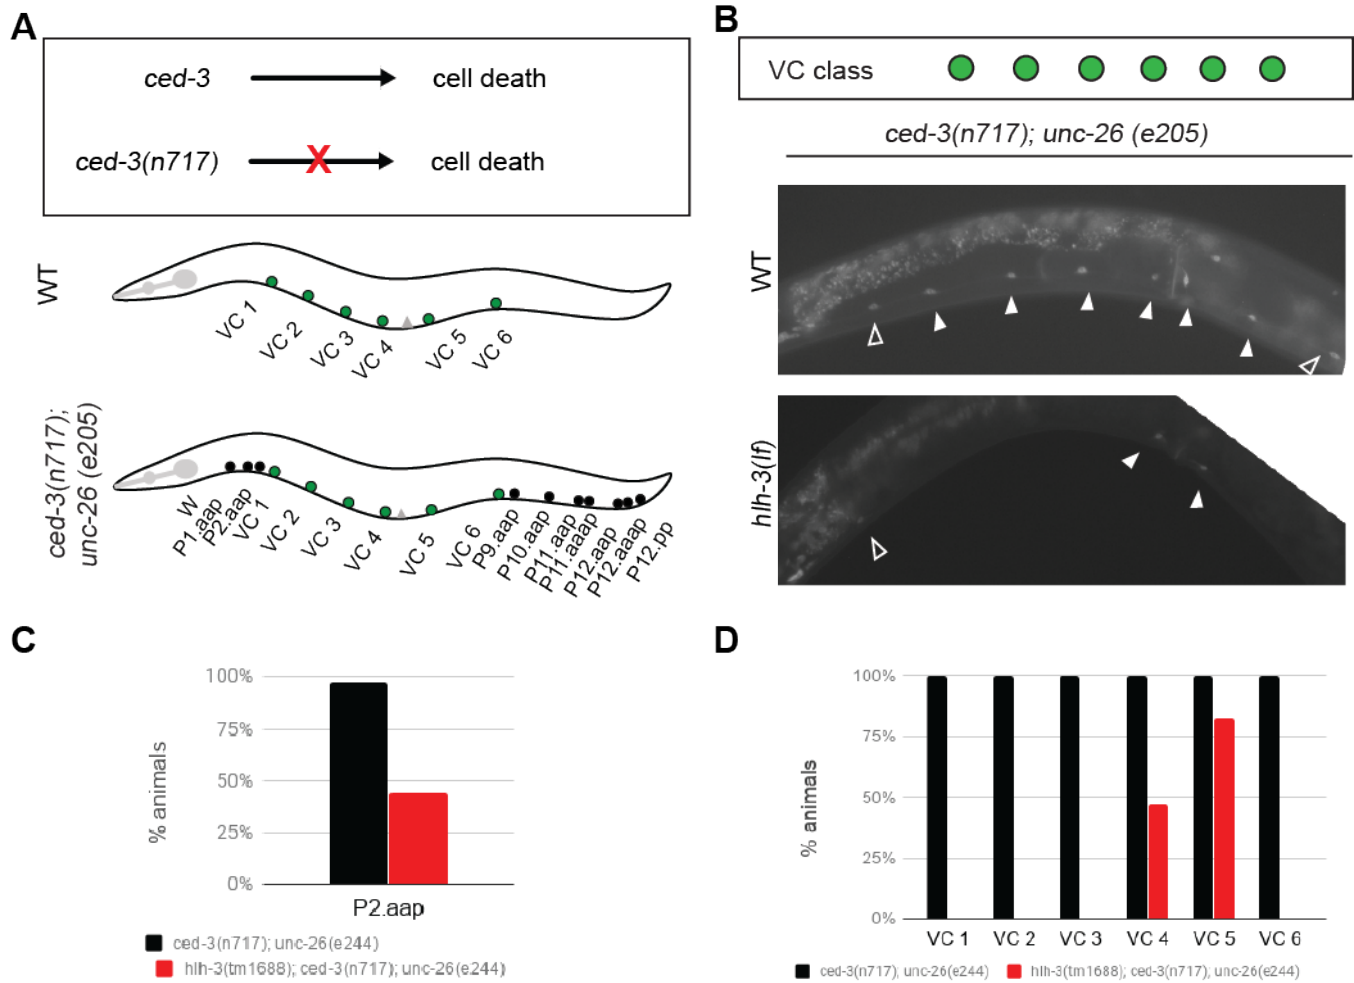

Figure 6. VCs do not inappropriately undergo programmed cell death (PCD) in the absence of *hlh-3* function.

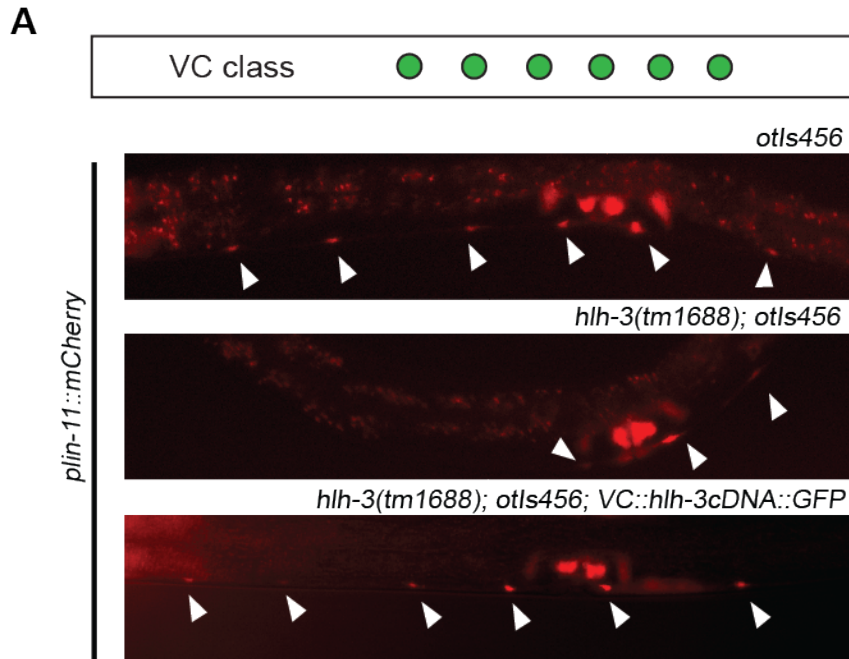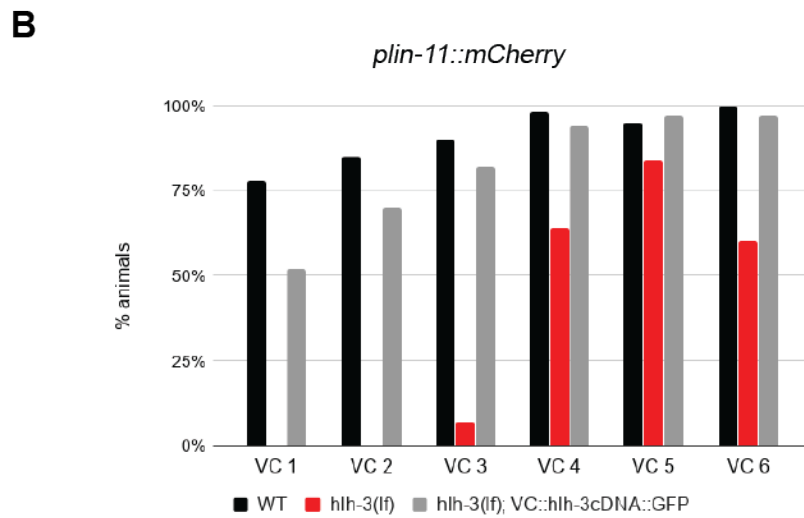

Figure 7. The function of *hlh-3* in VCs is cell-autonomous



**A**

| VC identity    | WT |   |   |   |   |   | <i>hlh-3 (lf)</i> |   |   |   |   |   |
|----------------|----|---|---|---|---|---|-------------------|---|---|---|---|---|
|                | 1  | 2 | 3 | 4 | 5 | 6 | 1                 | 2 | 3 | 4 | 5 | 6 |
| <i>lin-11</i>  | ●  | ● | ● | ● | ● | ● | ○                 | ○ | ○ | ◐ | ◐ | ◐ |
| <i>ida-1</i>   | ●  | ● | ● | ● | ● | ● | ○                 | ○ | ○ | ◐ | ◐ | ○ |
| <i>glr-5</i>   | ●  | ● | ● | ● | ● | ● | ○                 | ○ | ○ | ◐ | ◐ | ○ |
| <i>mir-124</i> | ○  | ○ | ○ | ● | ● | ○ | ○                 | ○ | ○ | ○ | ○ | ○ |
| <i>unc-4</i>   | ○  | ○ | ○ | ● | ● | ○ | ○                 | ○ | ○ | ◐ | ◐ | ○ |
| <i>unc-17</i>  | ○  | ○ | ○ | ● | ● | ○ | ○                 | ○ | ○ | ◐ | ◐ | ○ |

**Penetrance**

● ON

○ OFF

◐ PARTIAL

**B**

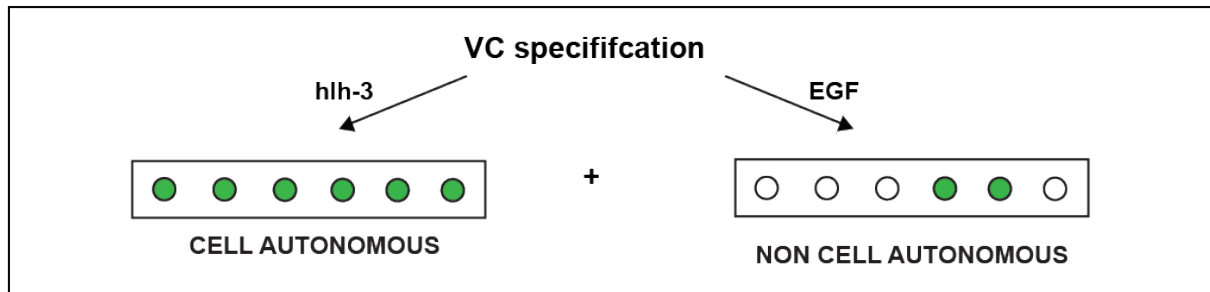

Figure 8. Two pathways promote acquisition and maintenance of VC-class and VC-subclass features

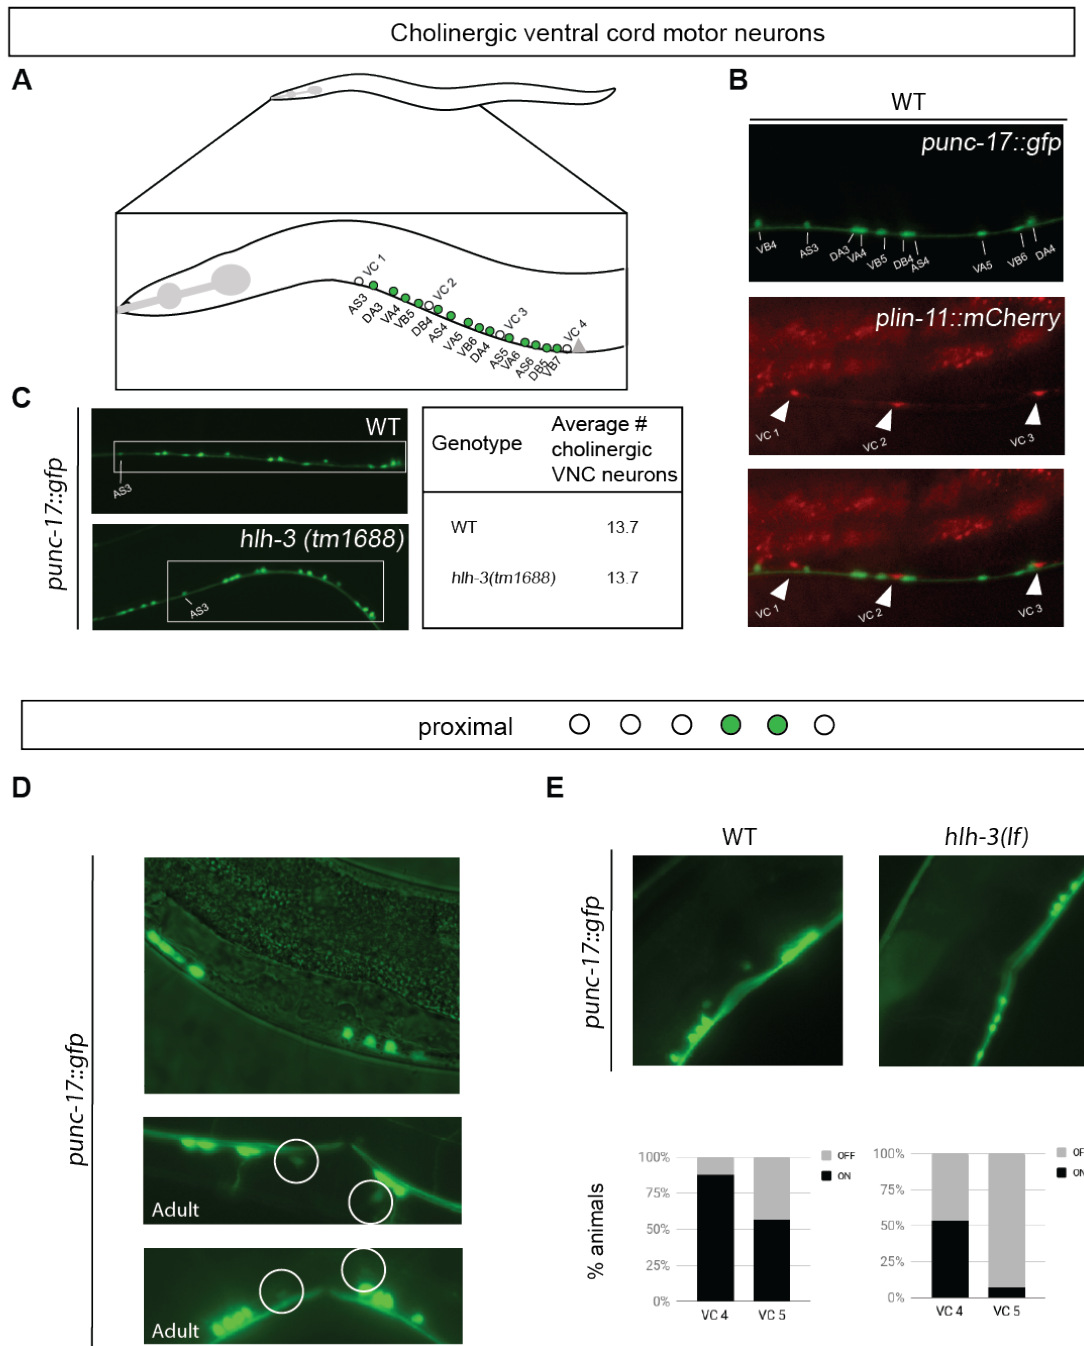

Supplementary Figure 1. Cholinergic, sex-shared ventral cord motor neurons differentiate normally in *hlh-3 (lf)*.

**A**

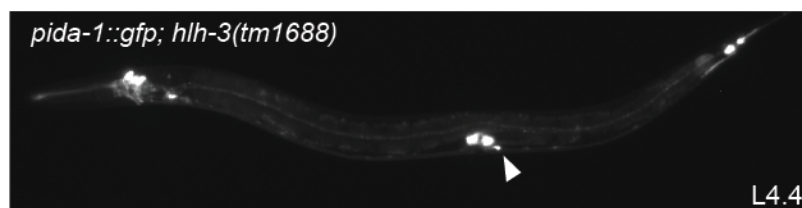

**B**

| N  | Genotype             | L4 substages | VC 1 | VC 2 | VC 3 | VC 4 | VC 5 | VC 6 |
|----|----------------------|--------------|------|------|------|------|------|------|
| 14 | <i>hlh-3(tm1688)</i> | L4.0-L4.3    | 0%   | 0%   | 0%   | 0%   | 0%   | 0%   |
| 48 | <i>hlh-3(tm1688)</i> | L4.4-L4.9    | 5%   | 2%   | 7%   | 40%  | 67%  | 10%  |

Supplementary Figure 2. *hlh-3* acts prior to early larval L4 substages.

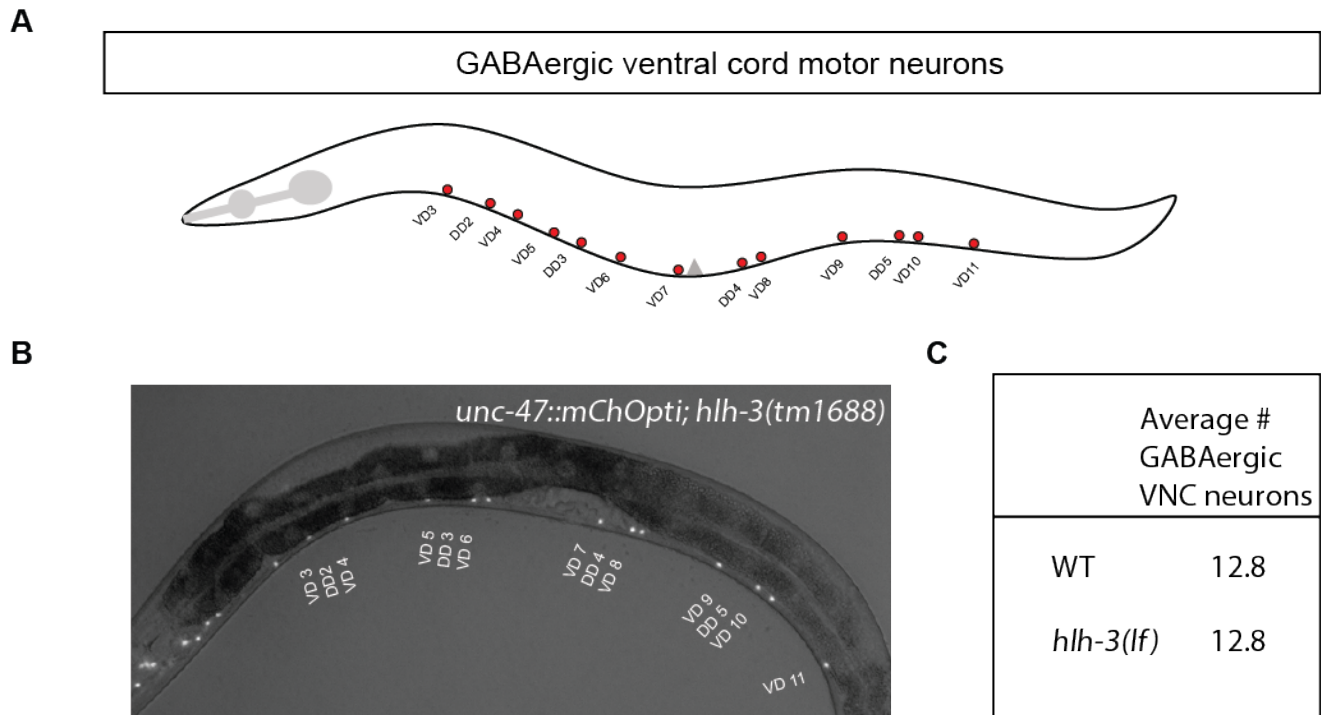

Supplementary Figure 3. GABAergic, sex-shared, ventral cord motor neurons differentiate normally in *hlh-3 (lf)*.

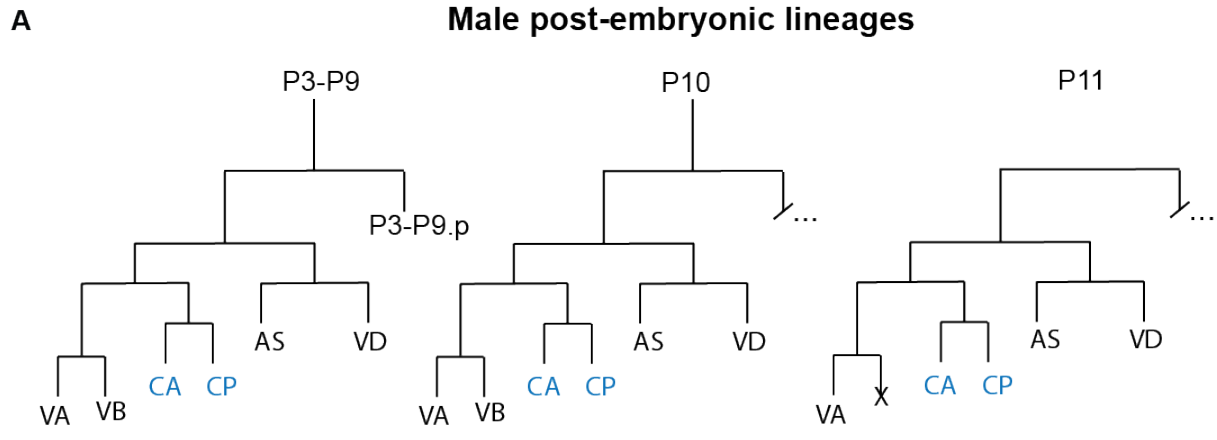

**B**

| Marker                | Lineages | P3-P9 |   |   | P10 |   |   | P11 |   |   |
|-----------------------|----------|-------|---|---|-----|---|---|-----|---|---|
|                       |          | 1     | 2 | 3 | 4   | 5 | 6 | 7   | 8 | 9 |
| <i>ida-1::gfp</i>     | CA class | ●     | ● | ● | ●   | ● | ● | ●   | ● | ● |
| <i>tph-1::mCherry</i> | CP class | ●     | ● | ● | ●   | ● | ● | ○   | ○ | ○ |

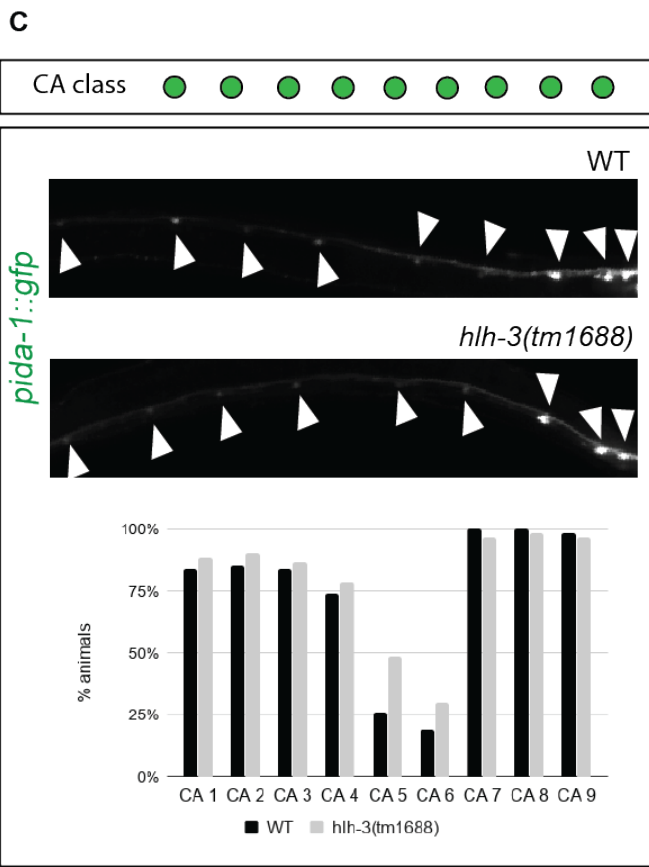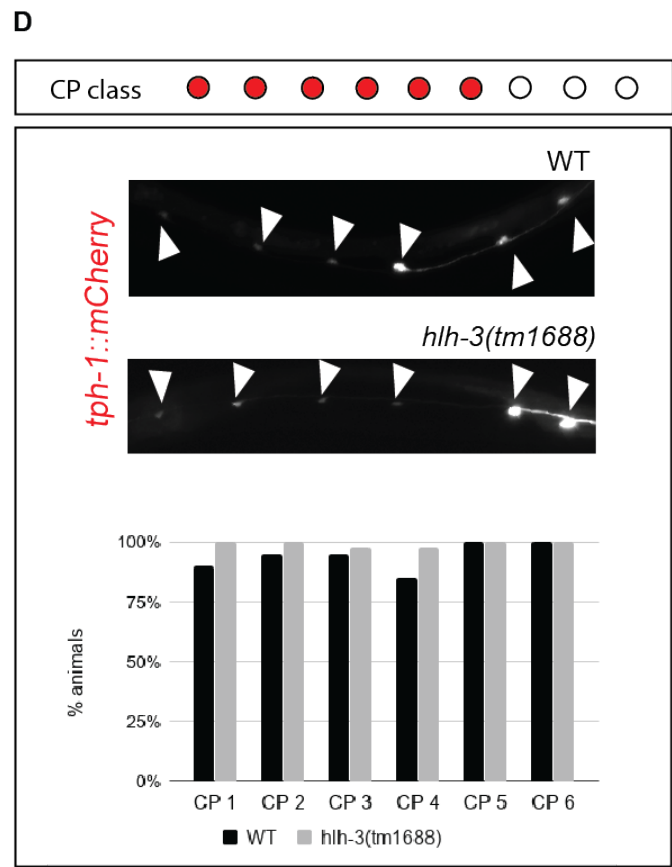

Supplementary Figure 4. The differentiation of the male-specific ventral cord motor neurons derived from P cells is not affected by the absence of *hlh-3* function

| <b>Strain</b> | <b>Genotype</b>                                                                                          |
|---------------|----------------------------------------------------------------------------------------------------------|
| AL166         | <i>inls179 [pida-1prom::gfp] II ; him-8(e1489) IV ; hlh-3(tm1688) II</i>                                 |
| AL184         | <i>vsIs48 [punc-17::gfp; him(e1490) V</i>                                                                |
| AL195         | <i>vsIs48 [unc-17::gfp; him-5(e1490) V; hlh-3(tm1688) II</i>                                             |
| AL270         | <i>icIs270 [pglr-5::gfp + lin-15(+)]</i>                                                                 |
| AL273         | <i>hlh-3(tm1688) II ; icIs270 [pglr-5::gfp + lin-15(+)]</i>                                              |
| AL281         | <i>uls45 [punc-4::MDM2::GFP + rol-4(+)]; hlh-3(tm1688) II</i>                                            |
| AL284         | <i>icIs270 [pglr-5::gfp]; ced-3(n717), unc-26(e205) IV; hlh-3(tm1688) II</i>                             |
| AL287         | <i>icIs270 [pglr-5::gfp]; ced-3(n717), unc-26(e205) IV</i>                                               |
| AL303         | <i>otIs564 [unc-47fosmid::SL2::mChOpti::H2B; pha-1(+); him-5(e1490); him-5(e1490) V hlh-3(tm1688) II</i> |
| AL325         | <i>hlh-3(tm1688) II; mjIs27 [mir-124p::gfp + lin-15(+)]</i>                                              |
| AL331         | <i>ic271 [hlh-3::gfp] II</i>                                                                             |
| AL338         | <i>hlh-3(tm1688) II; otIs456 [plin-11::mCherry; pmyo-2::GFP]</i>                                         |
| AL341         | <i>otIs456 [plin-11::mCherry; pmyo-2::GFP]</i>                                                           |
| AL346         | <i>hlh-3(tm1688) II ; otIs456 [plin-11::mCherry; pmyo-2::GFP]; icIs274 [VC::hlh-3cDNA::GFP]</i>          |
| AL348         | <i>ic271 [hlh-3::gfp] II; otIs456 [plin-11::mCherry; pmyo-2::GFP]</i>                                    |
| BL5717        | <i>inls179 [pida-1prom::gfp] II ; him-8(e1489) IV</i>                                                    |
| OH11954       | <i>otIs456 [plin-11::mCherry; pmyo-2::GFP]</i>                                                           |
| OH13105       | <i>otIs564 [unc-47fosmid::SL2::mChOpti::H2B; pha-1(+); him-5(e1490) V</i>                                |
| SX621         | <i>lin-15B&amp;lin-15A(n765) X; mjIs27 [mir-124p::gfp + lin-15(+)]</i>                                   |
| Tu3067        | <i>uls45 [punc-4::MDM2::GFP + rol-4(+)]</i>                                                              |
| JWR29         | <i>tph-1::mCherry; lin-39fosmid::gfp</i>                                                                 |
| AL262         | <i>tph-1::mCherry; lin-39fosmid::gfp; hlh-3(tm1688)</i>                                                  |

Supplementary Table 1. List of Strains
